# Supplementary material for: A logic-incorporated gene regulatory network deciphers principles in cell fate decisions
Source: eLife. 2024 Apr 23;12:RP88742. doi: 10.7554/eLife.88742 (PMC11037919; doi:10.7554/eLife.88742)
Supplement: Supplementary file 1. — The spreadsheet titled ‘MAP’ gives the relative energy in Figure 4D and G, Figure 5E and G, Figure 7D. [file elife-88742-supp1.xlsx]

## Sheet: AA 6231
k1,k4	k2,k5	k3,k6
1.4108	1.7305	0.33102
1.7763	0.0043401	0.59462
2.4569	1.4948	0.003448
1.3788	0.0046093	0.09991
1.5069	0.15846	0.19455
2.7515	1.4542	0.86471
2.5577	0.0022232	3.3801
3.5689	4.4663	0.42754
1.5854	0.11086	0.5852
3.0638	2.3826	0.94123
3.1572	0.059376	3.4304
2.9927	0.0020162	2.4292
2.0191	0.0067857	1.5304
1.9628	1.2387	0.0058181
3.4647	4.0407	0.11182
2.3171	0.70238	0.89126
2.6048	2.4654	0.083762
1.4694	0.19658	0.74978
1.5218	2.1553	0.052845
2.7445	1.8581	0.4358
1.5847	0.25466	4.7649
4.9435	2.646	4.3333
1.4322	0.37633	0.0082727
2.1109	0.009481	1.9367
2.3155	0.62787	2.8462
1.8721	4.9597	0.11247
1.5713	0.0021373	1.1012
4.0157	1.3207	0.02
2.9419	1.0921	0.012375
1.8823	0.17046	1.6004
1.8917	0.52267	0.31479
1.5238	0.14121	0.25363
2.5544	1.0033	0.14788
2.0405	0.1281	2.2773
4.2299	2.3434	0.0018646
1.4076	0.08608	0.19445
1.5122	0.0080251	0.23435
1.6599	0.56612	0.006009
2.0229	0.55361	0.0012085
2.3998	3.1971	0.20161
1.5176	0.97168	0.059874
3.5221	1.6317	0.0097025
1.8383	0.66015	0.016047
3.0808	0.0020296	4.8
1.4017	0.9762	0.0048128
4.3066	2.5899	0.0011192
1.7158	0.46222	3.6641
2.3423	1.0726	0.031417
1.7203	0.98125	4.1297
1.3874	0.0017785	1.169
2.4191	2.3302	0.0044011
2.1353	0.54549	0.012308
1.6122	0.043438	1.1032
4.0754	0.019229	4.653
1.4012	1.6353	0.1653
3.493	3.3977	1.0509
4.1263	1.5922	0.0042282
1.8431	0.048483	1.6245
1.405	0.050268	1.9503
1.7308	0.28974	0.84348
3.0919	2.1291	0.67586
1.8934	0.047245	1.5426
1.9005	0.36938	0.82839
3.8084	1.6871	0.0015563
3.1671	0.96325	0.37836
2.3406	0.011831	2.5463
1.8065	1.8319	0.079355
2.1761	0.012228	4.6409
1.9037	0.011026	3.0649
2.6122	0.0095103	4.9802
1.5544	0.014995	1.1563
3.0925	1.1984	0.0017639
2.0928	3.7486	0.0011208
1.9893	0.054838	1.6092
1.7775	0.0029188	0.58905
2.4856	1.3279	0.10373
1.8366	0.24605	0.29968
2.5266	1.2239	0.06999
2.1017	0.23676	0.42073
1.4392	0.038847	1.3722
2.4214	0.063711	1.5134
2.7749	4.3561	3.9623
1.8762	0.0056206	1.8167
1.5607	1.2522	0.0089122
1.3477	0.0037124	0.87376
1.5104	0.49729	0.012765
1.663	1.4378	0.010704
2.5767	0.0073605	2.6556
1.9188	0.0028515	4.014
2.4786	1.1198	0.22466
4.6896	2.7829	0.0047682
1.9826	0.85674	0.011449
1.5803	3.1611	0.0056866
2.0483	0.79943	0.010015
1.7733	0.36852	0.69706
2.357	0.0013963	2.3135
2.0068	0.19337	2.6605
1.6161	0.33706	0.1612
1.697	0.070369	3.5176
1.3696	1.0851	1.9004
1.5135	0.48698	0.0011999
1.7329	0.12739	4.8599
3.1767	4.6299	0.0037359
3.593	0.032766	4.9245
3.8553	3.8598	0.038259
1.3886	0.046118	0.23814
4.1577	3.1259	0.0041029
2.7321	2.111	0.01769
2.1864	3.9732	0.0046007
1.7745	0.011001	2.5968
2.0528	0.0012567	2.1134
2.6412	2.4336	0.043137
1.3848	0.37695	0.59728
4.1314	1.3535	0.07109
1.9172	2.3021	0.0052424
1.5861	0.0078473	2.3481
3.2278	3.5026	1.0171
1.7912	3.4715	0.27855
2.8765	0.16603	3.4312
1.5934	0.16757	3.7981
1.4489	0.094088	0.0041048
3.3187	0.0092262	4.6186
4.3551	4.0124	0.0026143
2.3883	0.0043239	4.5434
1.8412	1.3091	0.1802
3.2683	3.9266	0.4596
1.5316	0.072667	0.1564
3.6343	3.3704	2.3358
2.4877	1.8018	0.6277
2.2501	0.73562	1.6011
1.4517	0.0033527	3.5977
1.8561	0.031742	1.8826
4.8159	3.2984	0.0021707
1.9128	0.015133	0.80169
2.4767	3.6672	0.0030889
1.8768	0.021464	1.0903
2.1184	2.233	3.3227
1.4086	0.0063196	0.94153
1.4969	0.099925	0.052951
3.0993	2.085	0.0038263
2.3748	3.9525	0.0036538
3.409	2.4167	0.12051
1.606	2.0674	0.012262
2.0832	0.23534	3.5904
1.7672	2.88	1.516
1.4209	0.13992	3.2697
2.2138	4.2372	0.001044
4.1176	4.2329	0.21968
1.6973	0.32812	0.047771
2.6515	0.79828	0.016063
1.8697	2.3856	0.54104
2.7427	0.0022828	4.2371
1.8242	0.096704	4.4461
1.7819	4.726	0.0043554
4.8977	4.3402	2.0374
1.595	3.7517	0.11508
1.4328	0.0011743	0.27385
3.1936	3.8726	0.081056
1.9423	0.0011616	1.8586
1.4088	0.10734	0.075005
4.6991	3.5796	2.7556
1.7899	1.6344	0.42446
1.3822	0.022578	0.030575
3.2353	4.8078	0.058632
3.2176	0.0046867	3.5269
1.3434	0.19522	0.29677
1.8554	4.3208	0.0032523
1.7819	0.6203	0.06064
3.2013	1.0067	3.5879
1.577	2.228	0.23922
3.6679	4.4872	0.007171
1.9118	0.0077066	4.7229
1.4949	0.21553	3.4074
1.499	1.8913	0.28129
1.4487	3.4447	2.8233
1.8287	0.44133	0.24821
1.6808	0.2417	1.5652
3.366	0.76366	3.1429
3.0104	2.1528	0.43258
1.9137	2.5322	0.038003
1.8346	0.0016387	0.90462
1.4963	0.0025032	0.33086
1.4874	0.23931	0.078453
2.4618	2.8858	0.0015826
2.1543	0.14404	1.199
1.4135	0.68063	1.1169
4.8629	1.7186	0.023399
4.0431	2.3254	1.499
4.2934	1.3728	0.01335
3.3337	3.6478	0.67711
2.3825	3.6971	0.73748
3.2424	2.7005	0.063383
2.7163	0.66649	4.2398
1.6316	0.58949	4.2231
1.4153	0.016276	2.141
1.3476	0.33289	0.0021198
1.3746	1.0916	0.23725
1.6054	0.24484	4.1069
2.784	0.021905	4.5447
4.0797	1.3544	0.010734
1.4405	0.020766	0.36345
1.4719	2.9764	3.7802
2.7982	0.93585	4.1976
1.6983	0.30989	0.0014828
2.0578	2.936	0.002714
2.593	3.6405	0.46075
2.1617	2.6983	0.16602
2.9029	1.8925	3.2956
1.8263	0.0093884	0.96747
2.7125	2.7299	0.0010326
1.4417	0.35389	1.2975
1.8489	0.0024186	3.145
1.8293	0.063753	0.49744
2.2108	0.43687	4.7719
1.3802	0.12298	0.020747
1.4154	0.0019433	1.9685
1.7199	0.30702	0.0052246
4.1222	3.7621	1.1355
1.6656	1.8444	0.0029669
2.3643	0.064502	4.2488
3.4351	3.7159	2.5672
2.4067	0.0054439	3.0066
2.3944	1.1298	0.19155
1.4662	0.10712	1.1109
4.0439	3.1518	1.9516
3.1771	1.0946	1.7616
2.1898	0.47239	2.7855
2.4567	0.57306	0.13852
1.4903	0.12336	3.8746
2.2318	0.23184	2.6262
1.6618	0.042118	2.4182
3.4895	4.8594	0.046892
2.888	1.9759	1.0931
3.4254	4.3572	1.4437
2.9266	4.6193	0.041528
2.3722	0.52008	0.0084824
1.8373	0.006686	1.1734
2.0394	3.2642	0.94219
4.76	3.1211	1.4754
1.457	2.3876	1.8218
1.7806	2.1504	0.0030948
1.6917	1.9485	0.01375
2.7552	1.7176	0.0060515
2.2708	0.26719	2.0254
2.6498	1.952	0.0043582
1.5418	0.64231	2.4331
2.0319	0.24052	1.3003
2.1029	0.0769	2.8538
2.0391	0.89827	2.9585
1.474	4.4247	0.0010457
3.4238	0.0012897	3.3706
3.4672	2.3441	0.071023
2.0349	3.7913	0.010422
2.17	0.40363	2.0614
2.0093	1.9525	0.010222
1.3762	0.051473	0.031889
2.6175	0.90304	0.034631
1.5243	1.8319	0.67735
1.7299	0.53795	0.06489
1.5215	1.8048	0.0017463
1.8872	0.15512	1.9645
3.0752	0.4585	3.2326
1.3825	0.12712	0.027586
1.4057	0.0017605	0.52975
1.7333	0.014839	0.55889
1.988	0.64604	0.026826
1.3661	2.2267	0.015909
1.5661	0.36507	0.016335
4.8536	2.0282	2.1235
1.7161	0.14286	0.20209
1.7237	0.18374	2.9689
1.3581	0.004386	0.031867
1.4929	0.044288	0.84654
2.6598	1.3781	0.005007
1.7804	0.11852	2.0499
1.6568	1.1075	0.14678
2.114	3.1346	2.1382
1.5626	0.29962	0.8131
4.3273	3.972	2.6692
4.7951	2.2505	0.003834
2.2365	0.0034893	1.4702
2.0745	0.4952	0.0032279
3.2201	1.9243	0.48208
3.3876	4.7556	1.4122
1.3947	0.079892	0.056929
2.0669	0.020664	0.96721
3.7984	3.5753	0.54328
1.4138	0.36041	0.31435
1.4686	0.48621	0.01341
4.6634	1.3571	0.048254
1.5798	0.044527	0.94525
2.1229	2.5153	1.2067
2.7217	2.1968	0.0091551
1.7582	0.066497	3.2365
1.8221	0.42521	0.013302
2.7525	2.1881	0.0059568
2.3252	0.0045794	1.4438
2.1904	4.4266	0.33549
2.0004	2.6879	0.22865
2.0354	3.8653	0.010167
1.4894	2.6777	0.29886
1.5388	0.030349	0.24317
1.5202	1.7504	0.0049983
2.899	4.1993	0.009673
1.3926	0.0017687	4.2508
1.671	0.83742	0.0092515
1.3507	0.0027613	0.0543
1.9521	0.050559	3.2833
4.1182	1.0128	2.7751
1.7578	3.7335	0.017817
1.5054	0.4442	0.0047845
2.8104	0.0014705	3.5113
3.3807	4.3542	0.010409
2.0708	0.056918	2.4684
3.3689	2.7864	0.001913
1.3796	0.50977	0.0030343
2.6096	4.9708	0.0028176
2.4499	1.8793	1.3748
1.5285	0.030309	1.3915
4.2226	2.7758	0.099939
2.3214	3.2521	0.75348
2.0758	0.35412	0.46966
3.2472	1.3998	4.469
1.4547	0.018182	3.7328
2.3548	0.43847	0.99877
2.9066	3.4769	0.017162
2.9022	1.2197	3.835
2.6404	1.9086	0.2969
2.3312	2.6292	0.001103
3.8171	2.4111	0.99817
3.3034	0.14397	3.4022
1.681	1.3464	0.02059
2.3482	2.1517	0.034041
3.7278	2.738	0.0013192
3.9423	0.001024	4.4548
1.6823	0.0041812	4.8476
2.6254	0.16559	1.2558
3.485	2.4762	0.88197
4.0357	1.5986	0.0032918
3.3013	0.0041879	3.911
3.1044	1.147	0.0061569
1.7427	0.74701	0.0050469
4.17	0.0016143	4.6657
1.3554	1.4849	0.089326
1.9979	1.9328	0.27096
3.7682	2.1186	3.081
2.4119	0.54639	0.01411
1.7106	0.27507	4.1786
3.7646	1.9886	0.025072
1.9396	3.2561	0.070915
1.9434	3.249	0.017283
4.0383	4.9878	0.1839
1.4819	0.0013978	0.82704
3.6357	2.4973	0.20221
3.2192	2.5419	0.33559
3.6988	1.3755	0.004263
1.5226	0.26176	0.70878
2.8926	0.086446	2.271
1.9296	3.5934	0.25653
2.3333	0.043461	1.8984
4.2531	2.0855	0.11692
1.9273	0.012938	1.5422
4.6814	1.2258	0.4948
1.3643	4.6126	0.0056757
2.1446	3.763	0.0015364
1.6784	0.35585	0.6972
1.5027	0.63467	0.31443
2.1642	4.6802	0.0031451
1.9213	1.2475	0.24198
1.4248	0.01051	1.5256
4.2443	0.909	2.8303
3.9668	3.1222	0.015807
4.0626	1.3892	2.3437
1.6967	3.2355	0.50328
3.8024	2.7989	0.14643
1.7502	0.0099158	1.8912
3.169	0.84373	0.077945
1.7599	0.0049722	1.2831
3.6667	2.0793	0.70079
1.4199	0.010415	0.15451
2.3935	3.6553	0.055239
3.6919	2.4461	3.4266
1.5542	0.0042457	0.34729
2.2767	3.1561	0.0011939
2.7513	0.51549	0.43961
1.3945	0.02729	0.12305
2.1597	0.52473	0.42788
1.5672	3.1006	0.36157
2.908	0.031023	2.6187
1.4721	0.11382	0.2527
1.6236	0.0022039	0.96857
4.1918	2.1481	0.031216
2.142	0.030753	1.483
1.551	0.15972	0.0090904
1.545	3.735	0.2786
1.9536	0.029917	4.786
1.6276	0.0087061	1.0118
2.5776	0.0024944	3.809
1.9648	0.69416	0.19784
2.0845	2.109	0.0022158
4.6422	3.0298	0.0023192
3.9462	1.1225	4.4253
3.2522	0.58667	4.4168
1.3711	0.034798	0.054242
1.557	2.4325	1.4924
3.7968	1.1898	0.0024797
1.7778	0.043509	1.5183
1.7129	1.6077	0.033043
2.4698	0.31537	2.8615
1.3607	2.8051	0.013571
2.2465	0.91794	0.46024
2.1957	1.4403	0.02547
2.5442	0.21039	0.8923
1.4624	0.0035069	1.1681
2.0297	0.0096428	0.98385
2.8478	0.86768	0.22028
1.4292	0.21752	0.56879
1.565	0.07135	0.49609
1.37	3.9886	0.01141
3.8415	1.0819	0.009531
2.4439	0.66119	0.20067
1.7951	0.83034	0.078954
2.5272	4.1621	1.0913
3.481	0.74666	4.2134
3.1776	1.0096	0.21195
2.6291	0.49272	1.4109
1.7656	0.37808	0.0064884
2.0205	0.5847	0.1265
1.4344	0.092756	0.01787
3.3922	2.4948	0.026892
4.8644	3.1114	0.0035073
4.2677	3.2693	0.20392
4.8242	1.8392	2.2167
1.5013	0.79203	0.71008
1.5981	1.4031	0.030303
1.5241	0.82784	0.0046438
2.8646	2.8344	0.0053671
1.3471	0.015801	0.34036
2.1154	4.8494	0.17427
1.8273	0.010218	0.80836
2.323	0.018908	2.7181
1.9261	1.8569	0.69453
1.3645	0.04862	0.066672
2.7403	0.55236	3.4666
2.4691	0.0025348	2.2819
1.7246	4.8514	0.14268
1.6082	4.01	0.017607
2.5701	1.2189	0.17753
3.2214	0.6637	2.4795
1.7552	0.0014843	0.93136
1.3446	0.27233	0.16975
3.5071	3.1121	0.0024331
3.706	1.1763	0.14143
3.1177	2.7532	0.0082263
2.1144	1.2372	0.031816
1.6898	0.01034	1.4559
2.9007	0.31422	1.6747
1.4349	2.9877	3.6538
1.6601	1.3964	0.0051281
2.3081	0.97713	1.0409
4.256	3.9773	0.18134
2.2758	0.0037362	1.5486
2.5642	0.12254	1.4864
2.7824	1.2095	0.011226
2.5824	3.6219	0.0065685
1.7081	1.4199	0.0019725
2.2647	0.88643	1.2343
2.2307	0.01714	4.7863
2.4054	2.9221	0.099522
1.7822	0.038458	0.71386
1.9344	0.88481	0.084086
2.6118	0.2998	1.5898
1.3527	0.060592	0.020318
2.0907	0.19664	3.5712
1.4391	1.7226	0.062716
1.8606	0.12184	2.3914
1.8941	3.5692	0.019378
3.8241	0.56803	1.9526
3.2447	2.2763	0.0080744
2.4133	2.8888	0.0053004
1.4816	2.2053	0.0041296
4.4186	2.0176	0.0039828
2.0853	2.3098	0.015686
1.9803	0.22018	1.8581
2.0559	4.7462	0.044381
2.3598	1.259	0.60349
2.8366	2.3062	0.0020964
1.4028	0.0028636	0.25929
4.4157	2.5757	0.088611
1.5496	0.0076776	1.2578
1.4642	0.1086	0.0055161
2.453	0.91534	0.45078
3.2113	0.56934	2.8914
1.9958	1.4701	0.0031096
4.9971	1.4934	0.49721
4.512	1.1855	3.3159
1.431	3.7486	3.7476
1.9419	0.45654	0.13156
2.1101	0.26414	0.77447
2.6617	0.65649	0.20433
1.4095	0.014596	0.10778
2.6345	0.0048692	4.2531
4.391	3.8479	1.3933
2.0041	3.7152	0.0056368
3.2174	0.90835	0.0082217
3.606	0.001252	4.3757
4.114	2.0278	0.0039347
2.1448	1.1325	0.014472
1.4034	0.082202	0.24016
2.3693	3.9196	0.46103
1.7345	0.86647	0.036328
2.7966	0.004948	2.2502
2.3069	2.4999	0.015781
2.9616	3.43	0.22525
2.5907	0.61067	0.0078891
1.9721	4.464	1.225
3.7608	1.422	0.016303
1.4898	1.0868	4.3304
1.4988	0.60285	0.55534
1.4231	0.063677	1.183
3.3726	4.9773	1.4048
1.4731	0.014816	0.36023
1.3556	0.8734	3.1768
1.4637	0.0025378	1.8878
1.5964	4.0241	0.71659
3.2216	0.11102	2.4088
1.5012	3.3111	0.9553
1.8904	0.0038228	1.7004
1.6673	4.0077	4.9169
1.6329	1.6227	2.9225
2.6336	1.9986	0.19966
1.5564	0.22563	0.0010304
4.0732	2.8943	0.42282
2.0263	2.1659	0.0080282
1.3791	0.0067686	0.045171
2.0142	2.1127	0.77482
4.5103	1.2143	3.302
1.4324	0.93289	0.024467
1.3843	3.9929	0.0498
4.8717	2.957	0.041273
1.4861	0.15337	1.8927
1.5224	0.37687	0.6648
1.383	0.011774	0.1117
4.5305	2.5999	4.2857
1.4668	0.026474	0.41365
1.3852	0.10534	3.2958
2.7743	1.6994	0.0093869
2.0123	3.9376	0.039074
3.6361	2.0715	0.089717
4.5611	2.9812	0.056103
1.5617	0.0011714	1.962
1.3611	0.11748	0.033744
1.4807	4.8304	0.022476
1.8137	1.1854	0.0013208
1.6565	0.080599	1.2363
1.4845	0.0079495	1.0037
3.0566	0.0014384	4.7182
2.4771	1.1241	2.3195
1.6341	0.42793	3.8297
1.898	1.2558	0.0027619
1.4029	0.0048138	4.1675
2.8185	1.4117	0.0053335
4.1736	3.3415	0.054203
1.7309	0.90279	0.0017787
2.4187	0.058965	3.6604
3.694	4.1041	0.2406
1.3525	0.036724	2.9411
2.4096	2.7896	1.2635
1.439	0.0031425	0.14587
1.5075	0.2434	0.29453
2.9594	3.9722	0.44204
3.3158	4.7299	0.0065301
1.6311	3.3707	0.072454
1.3413	3.0631	0.014081
2.0429	0.57696	0.015555
1.4953	0.11912	0.080981
1.7121	3.81	4.8061
3.0321	4.6141	0.1089
1.5665	0.33862	0.085882
1.4541	0.060755	0.23743
2.0136	3.1425	0.027533
2.9661	0.80133	0.079393
1.5167	0.0023639	0.64103
1.4909	0.45262	0.13213
1.8109	0.0016254	3.6905
3.7411	2.7647	0.20497
1.4362	3.1502	0.0055442
1.9611	0.17301	1.6405
2.873	3.5668	0.015548
2.618	2.8095	0.011694
1.4497	0.0018796	1.2514
1.6187	2.1963	0.0055836
1.401	3.9002	0.35334
2.3131	1.5113	0.29476
1.8573	3.467	0.044791
1.5426	0.01674	3.9771
2.0408	0.0012231	4.5605
1.7369	0.23531	2.8061
1.6227	1.5234	3.413
1.3852	1.1247	0.0034774
1.3672	3.3972	0.098394
2.5645	0.32045	3.9246
1.5452	1.5815	0.0026045
1.8688	3.2628	0.040766
1.3424	0.56888	0.089881
1.691	0.70904	0.0094591
2.2206	0.0055184	1.8183
3.6993	0.10738	3.5476
1.9148	0.37277	0.016462
1.9911	0.14302	3.292
3.8944	1.8872	0.015498
1.9625	2.9023	0.045063
4.1855	1.8586	0.030353
1.3432	0.0015662	0.37777
1.4326	0.0037359	1.6211
1.8837	1.8621	1.2398
1.3697	0.06045	0.0011848
2.2944	0.010672	3.8621
2.2907	1.7036	1.5961
3.7766	4.1724	0.0040459
2.4927	2.6053	0.22317
3.0817	3.0178	0.37257
3.9609	2.3808	0.0016512
1.4367	0.35058	0.67985
1.3624	0.0018047	0.079601
1.3917	0.11835	0.041399
4.7814	2.0247	0.0010076
2.2345	0.65185	0.74219
3.2251	2.3008	0.001463
3.5867	1.4794	0.095141
1.5167	4.2475	0.026087
4.5401	1.3331	3.293
1.8854	4.9765	0.054915
2.8561	1.4062	2.2112
2.4333	2.8948	1.135
1.7863	2.009	0.023952
2.3123	2.1531	1.6625
1.766	1.6926	0.0038154
1.9517	2.7837	0.005355
2.0415	2.9189	0.24331
1.8648	0.31664	0.5512
2.107	0.0015918	1.9567
4.1426	4.9921	0.012925
1.8685	0.05258	1.3951
2.0752	3.2103	0.087455
1.3436	3.7416	0.045441
3.9374	1.7576	0.0047973
1.3654	0.72002	0.94878
1.4661	0.17593	0.0028974
1.6969	0.0026123	0.83156
2.5804	3.5941	0.4604
1.8449	3.9138	0.13703
2.2781	0.38093	0.87485
1.6603	0.47935	0.091792
3.3622	0.47986	2.2037
1.4599	1.7373	0.0033319
1.4106	0.362	0.010559
2.5759	0.10008	1.8667
2.0154	2.878	0.001112
4.9931	4.6076	0.022905
4.0069	1.0813	0.061589
2.2047	1.3786	0.053085
2.2739	2.9834	0.037861
2.5619	0.0021076	4.1111
3.3179	1.1838	2.4459
1.7394	0.18988	1.7237
1.4447	0.88705	0.004052
1.3922	0.4588	0.0010436
1.7338	2.2936	0.55297
1.7446	0.015769	0.65519
1.3529	0.057419	0.0016944
1.4436	1.0994	0.0031083
2.3708	2.5045	3.0242
3.4272	1.3987	0.0024317
1.6679	2.829	0.12889
2.3817	0.061374	2.5114
1.4118	0.015869	3.2431
1.4009	0.46297	0.011423
4.1772	0.98143	0.54458
1.423	1.8067	0.53971
4.4065	1.8958	0.015183
3.8258	1.2129	0.0010994
2.6893	3.2969	2.3008
3.1879	3.6752	0.023741
2.8179	0.032388	3.2877
2.9343	0.11528	2.6744
3.9396	2.2034	1.4852
4.8508	1.2146	0.38514
1.7916	0.7748	0.88519
1.6365	0.026736	0.4237
2.4304	0.51043	0.1458
1.3953	0.2546	4.5918
1.4285	0.060994	1.6375
2.3384	4.4286	0.0015017
1.366	0.19624	0.015963
2.9211	1.3012	0.06393
1.4239	0.9394	0.028247
2.1697	0.90577	0.0010439
3.4355	1.2241	0.011422
2.1117	0.01155	2.1669
1.517	0.0018635	0.27267
1.9552	0.057414	2.0113
1.9449	2.4281	0.13713
1.8185	0.0010405	2.9027
1.8009	0.10629	1.0806
1.7051	0.3868	0.59425
1.6158	0.005004	1.3623
1.6909	4.5994	0.048518
1.7417	0.0036787	1.8336
1.424	0.043746	0.36608
2.7248	3.2965	0.28084
4.1405	0.95192	2.5531
2.5552	3.6747	0.10113
3.7236	1.3742	0.41795
2.5807	1.6208	0.80527
2.589	0.0012858	2.2312
2.5926	0.0027658	3.582
2.208	0.034555	3.1529
2.6386	0.0061716	2.6287
1.377	0.036292	0.32369
4.782	4.1172	0.65403
1.6586	0.13368	3.7564
2.7199	1.9602	0.0055551
1.3605	0.47636	0.11803
2.1309	0.44098	0.002299
1.9475	0.6684	0.2967
1.9834	0.29198	3.4355
1.7589	0.0095079	0.77742
4.3046	2.7714	0.018582
1.4764	0.0283	0.51047
2.5946	2.4874	1.3111
1.9777	2.0546	4.7801
4.3799	1.7382	0.019241
1.4451	0.0056687	0.17313
4.0947	3.2231	0.0014642
2.7114	0.43284	3.7785
2.79	0.025176	2.3131
1.5741	0.0022118	4.4586
1.6373	0.66306	0.0041796
1.7021	0.0020189	1.2898
1.7693	0.58414	0.015998
2.6211	0.58386	0.32246
2.1909	0.53009	0.0037563
1.5733	0.0023509	1.7557
3.4964	0.010341	3.1808
1.935	0.0010757	0.87829
1.4751	4.519	1.7278
3.0071	1.3009	0.43078
2.4946	1.688	0.001625
1.4996	3.3774	0.0015659
3.5175	1.4058	4.079
2.0472	1.7608	0.0040767
4.6617	4.3978	2.1918
1.4991	0.24248	0.95093
2.3702	0.010021	2.5668
3.9732	1.6908	0.011559
1.7507	0.20967	1.9659
2.2862	2.2462	0.0019542
4.9092	1.8859	0.28433
3.5809	0.016198	4.7922
1.3585	0.060835	0.0012311
1.4756	0.0029465	1.2907
2.6023	0.0012661	2.667
1.7913	2.5783	0.010638
2.3013	2.7735	0.10933
3.6959	0.41396	4.9148
2.4687	0.92542	4.9576
1.4306	0.30258	1.7135
1.4332	0.54758	3.7822
2.0524	0.0015569	1.8659
1.6456	1.5705	0.01521
1.771	0.87621	2.3225
1.3941	0.012818	0.2589
1.5211	4.2975	0.07235
1.614	0.22698	1.846
3.003	0.57498	1.0314
2.0394	0.86896	0.0088892
1.5185	0.10185	3.0802
4.5715	1.452	0.0014796
3.5549	2.5422	0.04202
1.4772	1.4569	0.0013833
2.2988	0.014521	4.0117
1.3737	1.4192	0.081755
4.1416	0.45957	2.8988
4.0151	0.76868	1.2565
2.3436	0.0017937	3.027
1.494	0.11075	0.13352
3.1338	0.16427	3.088
1.6026	0.66357	1.4398
1.6539	0.44972	0.72532
1.5991	0.75017	3.2687
2.1842	1.24	0.0010988
1.8318	2.0773	0.0044538
1.5784	0.58957	0.22207
1.905	0.69876	0.0081527
4.4342	3.1537	0.0015353
1.5119	0.0015876	1.9018
2.0614	1.2866	0.017634
1.4206	0.14901	0.39957
1.5718	0.19107	3.818
3.4998	0.038748	3.4276
2.2169	0.044931	3.2944
3.9707	0.15804	2.8805
2.3703	4.5104	1.1441
1.5855	0.19586	0.004149
2.4487	3.1835	0.014682
1.3552	0.005094	4.3714
1.4146	3.7835	0.13588
4.2946	4.1309	0.13696
2.5287	0.24062	3.9579
3.1446	4.492	0.012569
1.4583	0.039565	0.41147
2.8899	0.88111	0.16933
1.4107	0.33549	0.35733
2.0301	3.4414	0.012044
1.7151	0.20053	0.94674
4.5703	4.6429	0.018307
3.9912	0.91551	0.46534
4.035	4.366	0.0013698
2.7159	0.0069114	2.4473
1.5938	3.134	0.10281
1.9693	1.9932	0.25675
1.4343	0.0031595	0.28912
4.0959	0.013962	4.764
1.5945	0.72963	2.9133
2.2848	3.1229	0.060455
1.4314	0.019835	0.26818
2.7111	3.6027	0.005153
2.4754	0.64869	0.17001
1.455	0.71691	3.729
4.3334	3.94	0.10214
1.6977	1.0451	0.023041
1.8471	0.017408	1.3218
1.6206	0.87579	0.034102
1.9849	0.79583	2.6112
1.8532	0.59285	0.0015539
1.9494	0.28799	3.8495
2.2975	0.68678	0.0050717
1.4508	0.013604	2.0741
2.0511	0.12814	2.371
3.1217	1.6097	0.082209
1.5136	0.56628	0.31938
2.9213	2.7537	1.6283
2.7671	1.6904	0.063566
2.3336	0.057132	2.3972
1.4181	0.19641	0.025219
1.6979	0.86365	0.0040488
2.076	1.5866	0.94884
1.7214	0.97714	0.051014
1.3472	0.0024255	0.17216
1.4199	0.23241	0.098229
1.7195	0.40805	0.15272
3.7497	1.3342	0.014941
1.4495	0.089696	0.0018301
4.4705	3.2815	0.10029
1.5511	0.0057759	0.34971
1.4371	0.92848	0.0071957
2.2813	1.7743	0.0047202
1.4158	0.01073	0.22319
1.5091	0.0054303	0.27942
1.8134	1.2412	0.0012942
1.3891	0.003926	0.26931
1.4994	0.10994	0.92951
3.0343	1.8718	0.025843
1.3759	0.73745	0.3067
1.6368	3.34	0.0014848
1.399	0.56837	0.09327
2.0507	3.3727	0.0097841
2.4976	4.6942	0.061785
1.681	0.99046	0.34681
2.0121	3.765	0.46915
4.0907	2.0442	0.074836
2.8958	2.7222	0.12219
2.5009	3.5452	2.7577
3.3782	2.7261	1.5698
2.4314	1.6901	0.014795
4.7629	2.9547	0.034011
1.5484	0.0031732	0.93667
1.625	0.0022774	1.5397
1.3651	0.23826	0.026497
3.1979	0.41801	1.3326
1.4495	2.4212	2.2054
1.8162	2.5074	0.028151
2.2181	0.0076252	1.8873
1.7781	0.72382	0.0054377
1.5743	0.45107	4.7842
2.7816	2.5926	0.0010262
1.6988	0.26528	0.010904
4.2498	0.21175	3.0898
4.0368	0.16111	3.8666
1.9079	0.5532	0.0039125
1.9089	0.46925	0.0018122
1.4405	0.0070175	1.9186
1.934	3.5083	2.2412
1.3621	0.1006	0.0018475
1.8921	0.71045	1.6243
1.4055	0.0010737	0.6016
1.641	0.3438	3.0307
2.6775	3.9518	0.0015413
1.8552	0.042866	1.6102
4.0363	2.6748	0.19428
2.5026	1.7394	0.023499
2.4153	0.68629	0.012522
1.4275	3.1162	3.0678
2.1483	1.1713	1.0364
1.7068	0.0040207	1.9602
1.9073	0.45232	0.016264
2.2093	2.8946	0.9134
2.1507	4.9752	2.0814
2.5584	3.8115	0.11355
1.6995	1.5059	0.0012543
1.7765	0.0056535	0.57165
1.5247	0.0028535	1.4994
2.1146	0.13768	3.1798
2.7192	1.3929	4.392
1.8216	0.27134	0.54342
4.4347	3.0726	0.039974
2.1477	0.32557	1.8445
1.8766	0.53292	1.2154
3.1139	0.99863	0.069294
1.4918	0.069089	0.61793
2.0234	0.001957	4.1299
1.7425	2.3795	0.034644
1.7723	0.081636	0.51609
1.8877	0.12366	0.51272
3.0763	4.6106	1.3771
1.5121	0.3184	0.0010837
1.7511	1.1549	1.4025
3.2763	3.3225	0.0092002
1.8598	0.0010995	0.75649
2.502	0.8329	0.19916
2.9108	0.054913	1.9789
3.2018	0.90223	1.2596
2.5238	1.388	1.026
1.396	0.018029	2.1473
3.7261	3.0236	0.081105
3.6998	0.20342	3.4287
2.7991	4.8929	2.9872
2.3904	0.01438	4.1891
3.4175	1.6562	0.035895
1.408	3.0774	2.3642
3.5562	1.3393	0.0019499
2.3029	0.99212	0.019359
1.8815	1.5288	0.0035917
3.0754	4.7071	0.76698
2.6301	0.75794	0.010895
1.8923	0.65934	0.98967
4.6949	2.7548	0.50727
3.762	0.88944	1.6863
3.2168	3.0984	3.752
1.8903	1.8807	0.06118
2.5565	0.73661	0.13607
2.813	0.62349	2.3353
2.3895	3.3254	0.0072007
2.6245	3.8762	4.393
2.8331	0.14178	3.1634
1.7371	0.44597	0.99353
3.1481	3.2788	0.0050216
2.4544	1.2293	3.873
1.3935	0.0044216	4.097
4.5166	3.5614	0.92121
1.537	3.6365	0.64161
1.3534	0.057461	0.077229
3.8061	1.727	0.22166
1.7512	2.9946	4.0797
1.7489	0.50879	0.0066606
1.3663	0.01566	0.68542
1.8103	0.56422	0.018927
1.8272	0.071298	2.4719
3.8342	1.3162	0.028389
2.296	1.0618	1.1635
4.8771	2.6413	0.47498
2.5083	0.044292	2.3572
1.8483	3.5622	0.14103
2.1665	1.7032	0.0037482
3.2209	1.3249	0.002021
1.6688	0.45179	1.1215
4.9373	1.5787	0.017568
1.5061	0.2476	0.82408
1.4188	0.99248	0.67928
1.5172	0.0093087	0.25149
2.3876	0.88527	2.2614
1.4329	3.0149	1.0478
2.7024	0.9566	2.1652
1.864	0.32485	0.012007
3.3983	0.012622	3.6305
2.4554	1.3907	0.054883
2.2348	0.13386	2.4319
1.8042	1.0214	0.12467
2.1357	0.0013416	1.6912
3.8859	4.2673	1.0391
3.6948	1.4321	2.6044
3.2898	3.4949	0.0031266
3.0428	1.1218	0.10883
1.5125	1.214	0.0012119
1.8757	1.117	0.011723
1.5581	0.011176	0.61588
1.7398	3.2801	0.88647
1.7987	1.5742	0.023046
2.9137	1.3477	0.0091154
1.5073	0.14705	0.36542
4.0074	4.3309	0.70136
1.6391	1.6137	0.0095797
2.09	0.0038559	3.8793
1.525	0.17062	0.22742
4.4428	1.3358	0.0036103
2.7495	3.9418	1.4786
1.441	0.0050815	3.0215
2.4356	1.7846	0.023109
2.282	0.74582	0.003666
1.395	3.4124	0.014675
1.6172	0.59121	0.010652
2.7672	1.9436	0.0071155
2.0597	0.36873	3.8112
3.2868	2.9656	0.1356
1.5115	0.20134	0.91338
1.7156	0.044299	1.3336
1.662	1.7741	1.0956
3.517	0.93471	4.5977
1.5789	0.46072	1.1854
1.6967	0.0085107	1.5903
4.2229	2.5408	0.003056
1.542	0.84684	0.012669
1.391	0.0080196	0.47453
1.5137	0.28467	2.0749
1.5158	0.54961	0.026577
1.6128	0.0045857	0.66053
2.681	3.7542	3.102
1.5269	0.014309	0.67636
1.4575	3.6765	0.32831
1.5369	0.24326	2.3064
2.3584	0.70705	2.8065
1.4462	0.21899	0.028268
4.3401	1.7936	0.0012019
3.1003	2.0812	1.5157
3.7831	0.097495	3.2866
2.8819	0.0029577	2.1692
1.9386	0.10902	1.2812
1.9427	0.049762	3.1371
3.4152	1.0474	4.5589
2.0366	1.1139	0.0063042
1.5919	0.60702	0.0077817
1.4386	0.027846	0.90506
2.5974	1.0253	0.066995
4.3378	4.9576	0.019126
3.2003	4.344	0.0091521
3.3171	0.78754	0.17516
1.966	4.2073	0.20214
2.1455	1.0163	0.0037451
4.0717	3.4469	0.64037
2.0194	0.085157	4.2901
1.8867	1.0092	0.11352
4.2537	1.3834	0.1629
3.1868	0.0010732	2.8027
1.7329	1.4218	0.22341
1.5296	0.013314	1.0984
2.013	0.0079602	1.4349
1.7416	0.36959	0.0035538
4.1849	2.3184	0.53483
1.6209	0.0084554	3.0644
1.4224	0.1348	0.0095499
1.684	0.011132	1.3401
2.1974	0.046157	1.3837
3.1367	0.77167	1.3122
3.4987	1.8973	0.074288
2.7438	1.0417	0.015604
1.8972	1.2104	0.023485
4.4755	3.1706	4.6695
1.5476	0.85267	0.0046445
2.7644	2.282	0.098129
3.2345	0.0013107	2.8258
1.3849	0.53668	0.014855
1.8368	0.038548	0.57895
1.698	2.1901	0.0019972
3.8548	2.5537	0.11847
2.3476	0.64051	0.21592
2.369	4.7592	4.2594
1.4822	0.0013481	1.5356
2.9433	0.72709	0.18141
2.8673	3.6449	0.019734
1.4359	0.058944	0.094325
2.1606	0.59351	1.1227
4.5798	1.3196	1.7182
4.6638	1.562	2.1605
1.468	3.5866	0.0060626
2.6388	0.22388	2.9455
4.3562	4.8436	0.0025621
2.624	0.8008	0.023219
3.4777	1.2044	2.4006
1.3596	0.55655	0.065274
3.7336	0.27141	4.8915
1.6445	1.2332	0.017167
2.0536	2.0415	0.0054906
2.3433	0.68412	0.014527
1.6017	0.1253	4.6389
2.4287	0.91144	1.7317
1.7612	0.0011784	1.2019
2.3671	0.043318	1.2357
1.5256	0.0059429	0.30642
2.8953	0.014032	3.5124
1.6466	0.007432	0.64477
2.5572	0.61631	0.2215
1.3703	0.0015448	0.29647
2.5859	2.6216	0.038591
1.8488	0.0011538	0.71901
1.7527	1.7651	0.033384
1.9786	0.0056842	1.6966
1.7732	0.0014708	3.5807
2.4392	0.0070768	1.4887
1.3808	0.40381	0.051844
1.991	0.51336	2.7057
1.9775	3.0273	0.62938
4.9942	0.59795	2.7078
2.3388	1.9666	0.0019619
1.5086	1.4466	0.65842
4.9315	0.85596	4.3973
1.413	0.0093577	0.15538
2.6922	3.3723	0.0047168
1.5334	0.47094	2.7289
1.5144	0.074169	1.4458
1.5923	2.6839	0.0063655
2.2481	4.9721	0.11722
1.6573	0.015726	1.6097
3.4775	1.3007	0.0042558
1.345	0.0060048	0.41464
1.6624	4.0177	0.0015123
3.0116	1.4761	1.8796
2.1869	0.90179	2.8272
1.5878	0.0079344	0.89624
1.5415	0.47884	0.010342
1.5263	0.91909	0.0022272
4.0052	0.024846	4.4514
1.6933	2.4965	1.2652
4.7694	2.4816	0.0025607
2.9956	0.0036799	4.4134
3.9893	3.9661	0.062318
3.2305	0.88368	0.010949
1.6594	0.69179	0.2854
1.9125	0.28482	0.3447
1.5779	0.3459	0.014352
3.2128	1.7585	3.3787
2.0789	2.7125	2.7944
3.3636	4.0275	0.0094703
1.8391	3.9246	3.0113
2.5939	4.4169	0.012459
1.516	0.0038795	0.2634
1.3474	0.071651	0.0018036
1.7876	0.078118	2.3374
1.7689	3.8452	0.058516
1.7969	2.5631	0.08805
2.765	3.0553	0.0019004
3.3774	1.3633	0.23662
1.8628	4.9072	0.0040771
2.0582	1.0675	0.009529
2.047	0.050684	3.3791
4.8749	3.8168	0.055712
3.5989	0.10931	3.8364
1.6011	0.79129	0.077702
3.9803	1.8223	0.0051797
1.4676	0.12682	0.0012707
1.4715	0.035028	1.6051
1.7866	2.3378	0.0019693
3.0873	2.257	1.7745
2.3588	0.021129	2.3424
1.3447	0.025872	0.040658
1.7111	1.0073	0.0079109
1.459	0.13508	0.0077174
1.3486	0.0032214	1.4237
1.6449	3.2517	0.0037639
4.9682	2.0196	0.0022631
2.8193	0.0020553	3.2372
1.896	0.079807	3.2531
1.8957	0.86675	0.035723
2.2719	0.62242	1.2157
4.7132	2.6864	0.20091
1.3647	0.030553	0.011516
2.5481	1.4635	0.12349
4.8475	1.29	0.46552
2.7032	4.4758	2.4247
1.8792	0.018958	1.0331
1.4302	0.031609	0.57338
2.1226	3.4996	1.3809
1.3883	0.0040933	3.2715
1.4293	3.8604	0.31884
3.8129	2.3749	0.0019473
2.786	2.0592	0.36289
2.0486	0.37471	2.3484
1.9782	0.114	1.9098
4.6372	1.4043	0.0030459
2.1875	2.608	0.19856
3.4799	0.39439	2.8117
1.5776	2.0869	0.014113
1.5629	3.4804	0.015069
2.2504	0.51006	0.17977
4.6529	2.014	0.0079264
2.1675	2.4074	0.011627
1.3646	0.79379	0.012608
1.7861	1.7582	0.07219
2.9057	3.6896	0.0044048
2.1138	0.68073	0.065844
3.6377	2.9951	0.19675
3.8512	3.687	2.4259
2.0237	0.1835	0.63434
2.1859	2.2875	0.09793
2.2428	0.022331	2.6862
1.8294	0.4288	4.5726
4.8608	1.8647	0.01093
4.9511	1.6011	0.0070994
2.066	0.0034032	4.2092
2.6948	1.017	0.0071297
2.1239	3.8301	0.85969
1.816	1.0669	3.8465
1.5143	0.24493	0.0056118
3.4479	1.057	0.017821
2.3375	0.3779	1.4596
2.0252	0.03003	1.287
3.4552	1.9904	0.014735
3.8288	4.6903	0.035555
2.4656	3.3088	0.35989
1.921	1.1199	0.29474
1.5928	3.1139	0.15432
2.6588	1.3133	0.68751
2.1431	0.0021234	2.5769
1.5659	1.9054	0.0018572
2.0195	0.31252	2.5708
1.5484	0.0057347	0.93631
1.7667	0.0027201	0.64914
3.0405	0.0082672	3.753
1.7138	1.6738	0.0012374
1.3535	0.0073797	1.2826
2.4451	2.1205	0.016693
1.5942	0.084746	1.3789
1.4325	0.0076603	0.55342
1.649	1.9377	0.0023734
1.4261	0.19346	0.27761
2.9155	0.0037272	4.9136
1.583	0.37346	4.3555
1.3727	3.7783	0.1234
1.9165	2.5989	0.14014
3.4792	2.8879	0.0023737
1.8389	1.4101	0.0031257
2.339	0.61471	0.014931
3.8531	1.613	0.020372
3.1546	0.064829	3.4311
1.9323	0.16816	0.78379
1.6484	2.1866	0.52388
1.6306	1.8227	2.768
4.0547	2.1251	0.0019033
2.2898	0.36244	0.35382
3.6285	2.9053	0.012631
3.9506	1.7742	0.003321
3.2381	0.022323	4.0869
1.6429	0.053948	1.7283
1.7755	3.9054	0.024272
1.481	1.1166	4.9198
1.4889	0.044551	0.11893
1.4413	3.0454	0.018584
2.0027	0.82723	0.89397
1.6902	1.0556	0.11867
1.3577	1.1126	2.0149
3.9403	0.079174	4.0163
3.6778	2.778	0.0010061
4.9814	2.3799	0.0010363
1.357	0.0020628	0.15312
1.6476	3.3361	2.7766
1.3826	0.80044	0.025514
2.4138	4.0417	0.0016705
3.4461	0.0070323	3.9575
3.7347	2.5714	0.48507
2.6463	0.0061823	2.5362
1.4923	1.3567	1.6109
1.619	1.2628	0.0012774
1.617	0.024813	2.0493
2.3931	0.3003	0.55386
2.9264	0.24187	3.1315
4.5357	3.8266	0.19958
1.7465	3.5376	0.0028364
3.6609	3.632	4.7187
3.4649	0.0024554	3.7263
1.6499	2.0519	0.48018
1.6856	3.2649	0.085935
1.8605	0.38	0.14502
4.4882	3.4318	0.022968
1.341	2.8747	0.051827
1.8991	1.8134	0.013514
3.4023	2.7833	0.027072
2.0113	0.00292	0.98713
2.7896	0.83243	0.13447
4.3347	2.4922	0.048278
1.4088	0.049267	0.019653
4.5586	2.07	0.0020688
2.7822	1.0352	1.4364
1.757	0.23627	4.2739
2.426	0.0020835	4.9208
1.9994	0.67846	0.0011019
1.9605	0.67146	0.31
1.4702	0.051127	2.384
3.0726	4.2713	0.0056183
3.0584	4.5341	0.0060137
3.1065	1.0549	1.598
4.9536	1.537	0.98888
2.0067	0.0037471	0.93585
3.6827	1.5125	0.0054403
1.971	0.0082937	1.4372
2.2947	0.90011	4.772
1.7453	1.3946	2.0423
3.8125	3.3514	0.0022637
2.2097	0.014858	3.2783
4.0253	1.3731	0.0017558
1.6677	0.35238	0.10805
2.082	3.3293	0.0024274
1.5345	0.33679	4.5422
2.4416	1.1956	1.4951
3.1257	3.076	0.026468
4.62	3.0809	0.0058593
3.0967	4.7163	0.86375
2.4661	3.4834	0.15404
4.5258	1.5073	0.1734
1.8976	0.08821	3.0057
1.8853	2.0527	0.0033408
2.4656	0.99537	0.01681
4.461	2.1713	0.03067
1.496	0.0097119	0.32659
1.4963	0.010738	3.5893
3.0802	2.2939	0.0034117
1.5095	0.0043754	1.0718
1.9482	0.11615	2.1756
1.9338	0.0017833	4.7016
1.7312	0.15395	2.1813
1.4782	0.36902	0.014189
4.8504	2.8583	0.0286
1.6877	0.070825	4.7639
2.2653	0.76593	0.022831
4.1621	1.8301	0.0044998
1.6338	0.097518	3.7065
1.4626	0.48728	0.0055016
2.2497	0.55699	0.0082388
1.703	2.3547	3.0836
1.3508	0.029359	2.2231
3.5716	3.6569	0.12178
2.463	0.39431	0.45719
2.7352	0.57259	0.31069
2.0933	1.6869	0.065836
4.4401	1.8189	0.0014315
1.8476	1.6903	0.96171
3.321	0.19703	2.8932
2.0219	1.3121	0.0013362
1.3428	0.38533	0.001179
1.3435	0.24534	0.0080135
1.3459	4.702	0.074601
2.3158	0.12491	2.0701
1.6779	2.4286	3.0901
2.4855	2.5963	0.0097346
1.3955	0.15025	4.8726
4.5843	1.6894	0.0010122
3.9385	2.4577	0.064881
4.1688	0.59313	2.8204
1.7301	0.42558	0.13004
2.96	0.97231	2.3741
1.6228	1.2051	0.028054
1.6436	1.8858	0.02108
1.7795	1.7993	2.5409
1.5974	1.0304	0.45501
3.0905	3.4438	0.087839
1.5076	0.092612	0.42879
3.3397	1.036	0.33599
2.7258	1.6704	0.0036391
2.4144	2.2045	4.0918
2.9493	0.52908	0.90152
2.6145	0.69149	1.6264
1.845	0.0030902	0.78206
2.7412	4.7889	0.26062
1.6924	0.73583	0.58342
2.7118	0.0012809	3.1519
1.7355	0.37555	0.0046305
1.6715	0.0052597	2.504
3.9078	0.44072	1.8017
3.857	4.4488	0.030897
2.181	1.7372	1.078
1.7999	1.1208	1.8551
1.8984	1.677	0.23993
2.4371	3.3927	2.0129
4.7063	0.94252	1.8186
2.1105	0.22497	1.1275
3.2001	3.9726	0.0010956
2.1877	1.5023	0.0013678
1.4683	0.018613	1.7541
1.371	0.20488	0.33174
1.6958	1.1953	0.037411
1.7677	0.30644	0.16138
1.5116	0.073627	1.1037
1.5662	3.2241	0.28554
2.1994	1.8298	0.007531
1.374	0.0075947	3.4186
4.2316	4.2508	0.0035231
2.6154	0.018112	3.2572
3.8618	1.1032	0.014985
1.4801	4.3452	0.11831
1.4837	4.2317	0.0011859
1.5223	0.047841	0.36165
1.4442	0.5434	1.2214
2.5183	0.41094	0.35133
2.5127	0.041103	4.5344
2.9224	0.017022	2.2248
1.806	0.51607	3.5274
3.3972	1.4269	0.1706
2.0602	0.003614	3.1612
2.4979	0.033841	1.9501
2.6341	0.36165	2.9828
4.4236	1.8079	3.1171
3.3702	1.1454	0.0055843
4.6179	2.6433	2.6768
1.8197	2.6945	0.025286
1.5163	0.56655	0.11184
2.4921	4.6559	0.0060316
2.8549	0.0024529	3.8026
1.7615	0.49818	0.0021725
1.5107	1.0647	0.12932
1.7146	1.7207	3.3014
1.5164	0.16142	1.0578
4.3036	1.2732	0.049881
3.1352	2.0771	0.014702
3.698	3.0622	0.0036011
1.4111	0.63662	0.0017576
4.1365	2.6606	0.035184
1.884	2.918	0.038831
1.7116	1.5958	0.33616
2.3576	0.62205	4.5694
1.4436	1.1171	4.9517
1.7797	0.35612	1.958
3.3425	4.298	0.00547
2.1331	0.71991	0.15584
4.5127	1.9154	0.0017163
1.6644	0.029739	1.4222
2.5685	0.23246	1.5846
1.7752	0.0072291	2.1532
1.7064	0.11128	0.37343
1.4779	0.37979	0.013046
2.3793	0.62981	0.0020194
1.4749	0.39977	0.001068
2.2276	0.11338	1.8063
4.7211	2.5011	0.051605
2.4015	0.80994	0.40124
1.8445	0.38268	0.72119
1.3977	1.2928	0.9228
1.9967	1.5468	0.095921
3.1231	0.51045	2.9997
1.5245	3.2926	0.024216
2.1635	0.026077	1.926
1.6433	0.055723	0.30556
1.6672	0.1662	0.71685
3.522	1.2553	1.2982
2.1819	3.7986	0.6147
2.0268	0.0088125	1.1919
4.1069	2.9163	0.0021444
1.4567	0.67966	0.0011263
2.336	0.24267	0.98575
3.8097	2.8909	0.0058472
3.1266	2.4628	0.0062362
2.0277	0.11261	1.6761
1.4606	0.091431	0.0102
3.3285	0.7578	0.98267
2.3128	2.2304	0.27889
1.6962	0.098007	2.9719
4.3895	3.4656	0.0016445
1.6804	2.4606	0.22852
1.4843	0.58023	0.056021
4.3695	0.46654	3.2136
1.8226	0.0018334	1.7933
1.4491	0.0064885	0.79709
1.3856	0.19248	0.0029402
1.4133	0.020402	0.065617
3.7751	4.5923	0.018169
1.8743	3.7197	0.1569
1.9015	2.3625	0.0010499
2.945	0.0049611	3.3675
2.4711	0.03003	2.0946
1.6022	0.0034339	1.2671
4.7656	3.7122	0.023825
1.3966	1.8183	0.18982
1.4082	0.024262	1.6696
1.8205	0.64571	0.010595
1.5734	0.7723	1.0977
1.5735	0.64839	0.032415
2.7152	1.0067	0.02156
2.5551	1.2528	0.0086152
4.649	3.2249	0.1202
3.2024	1.509	0.26752
3.9301	0.13767	3.2352
1.7107	1.3934	0.17046
1.4832	0.23238	0.5777
3.5857	3.6758	0.020699
3.3515	1.5951	0.0041303
2.6782	3.0716	0.029298
2.0751	0.33781	4.0915
4.1643	0.4061	2.1901
1.4123	1.0285	0.038069
1.711	1.1127	0.0086974
1.3685	2.5334	0.0058751
1.467	2.9267	0.0012945
1.9556	0.014519	2.7043
2.5012	1.6609	0.0073883
1.8565	1.221	3.3723
3.4028	0.049283	3.2605
2.4776	0.035875	2.4105
1.5151	0.0012205	1.7484
4.5064	3.8079	0.0013273
1.6533	1.1418	0.033095
1.511	0.62755	0.0024651
1.3457	0.088334	0.1225
2.6987	0.0099927	3.5753
1.6545	3.61	0.37989
1.3586	2.4292	0.0060737
1.6824	0.23386	1.0078
4.2242	1.4085	1.7864
1.3521	1.4563	0.35427
1.9325	0.32293	1.7022
2.2728	0.077634	1.3996
2.007	4.1599	0.031152
1.6064	0.0090168	3.7029
2.4624	3.6193	0.0094271
1.5209	0.018102	3.9786
2.7498	1.0791	0.0011035
2.6025	0.016127	3.4378
1.4305	0.048251	0.051893
1.4144	0.085673	0.071613
1.9093	0.023312	4.1019
3.2536	4.1314	1.3685
2.3813	0.057066	1.9639
1.9758	3.533	0.014886
1.7646	0.46214	0.0025435
3.7394	2.7356	3.019
2.9262	2.1874	3.2398
1.8589	0.010104	1.017
1.4575	0.81471	0.72084
1.3833	0.012988	1.113
2.2482	1.3272	0.65391
2.1622	2.099	0.044594
1.749	0.0040448	1.086
1.3456	1.2551	0.0079094
4.9448	4.916	0.0070564
2.0356	2.1721	0.15274
1.4933	3.7491	0.95129
1.3739	0.0017289	1.4576
2.3145	0.011034	1.5193
2.7357	0.58763	1.9032
1.3694	0.051218	0.48996
1.4719	0.26204	0.85808
2.7079	0.73051	0.042709
2.5171	0.65677	0.0061093
1.9882	1.387	0.27493
1.5318	4.9829	4.0175
1.4617	2.0344	0.32528
1.8912	1.7152	0.0023993
2.1638	1.1124	0.8687
2.1284	0.0057448	1.704
2.2456	0.0025791	2.4294
1.349	0.11243	1.2043
3.434	2.6947	2.2865
1.5759	0.003883	1.8092
2.2721	0.37478	1.5934
3.6626	3.0569	0.03093
1.7984	0.005788	2.2521
2.9657	4.5054	0.0044863
4.055	4.2738	3.3295
3.0266	4.1627	0.014783
4.0719	0.38883	2.9494
1.647	0.20662	0.011413
1.5858	0.063248	0.70938
1.3845	0.48143	0.031012
1.6786	4.1882	0.010554
1.676	0.15784	1.4216
2.0213	2.7251	1.6754
1.7921	0.0023157	0.62524
1.7534	1.705	0.044716
2.1451	0.19794	3
1.4446	0.27316	0.1704
2.0125	2.187	1.0432
1.53	0.5142	0.27429
3.8077	1.762	1.105
4.8282	2.6278	0.086431
4.3038	2.6249	0.0013017
2.4145	1.2295	0.0010798
1.3866	1.5595	0.014565
1.5822	0.45454	3.6039
2.1525	0.24914	1.635
1.5743	0.37239	0.0029069
2.0265	1.9429	0.21401
2.1409	0.49879	0.16686
2.5267	4.1874	0.62436
1.6132	0.0019916	1.3798
2.642	1.0315	0.14301
1.5844	0.78579	0.018153
1.48	0.031717	1.0755
1.418	0.28927	0.012953
3.0097	1.6437	0.47734
3.8429	1.111	0.75655
1.3701	0.67465	0.012168
1.4444	0.22229	0.88358
3.7015	3.2141	4.0524
1.3744	1.4415	0.5793
1.8781	0.0010937	4.6768
3.119	0.0063808	2.7259
3.3276	0.46804	4.9747
1.4762	1.4181	2.9332
1.4191	0.29062	0.007106
1.6112	0.013407	2.3381
1.8415	0.58846	0.0016403
1.9591	0.41336	0.035116
2.7034	0.76079	0.014306
1.4253	0.88548	0.030811
2.5454	2.4586	0.085379
3.7048	0.091753	4.1003
2.4126	1.2947	0.0053212
2.032	3.128	0.10198
1.6144	1.7052	0.012844
2.0303	0.033659	1.7244
4.0207	4.9981	0.0056701
1.404	0.0013433	1.9284
1.8607	0.0064491	0.99665
1.7104	3.1442	0.0022525
1.4169	0.29496	0.0047068
2.181	0.47096	0.31038
2.4526	1.7595	0.23237
4.8611	3.5512	0.092523
1.9425	0.95919	0.1838
3.134	0.0013403	2.532
1.5352	1.1517	0.76383
2.7491	0.92106	0.030006
2.7528	0.0032249	2.9926
1.8115	1.3512	0.014549
1.6987	0.23575	0.37214
1.7894	0.53209	0.083815
3.5791	1.1255	0.010236
4.3003	1.481	0.42503
1.3601	0.28743	0.0098888
2.417	4.4118	0.0012184
2.7333	0.84509	0.082608
3.2121	2.0972	0.20365
1.788	0.011864	0.62222
4.2389	0.12416	3.9058
1.4045	0.0033271	0.10259
4.3323	2.6876	3.8182
2.2662	4.8792	0.018199
3.0877	1.2079	0.0041158
1.3901	0.78086	0.33053
2.5438	0.9519	1.4588
2.6543	0.14267	1.393
3.0203	4.7313	0.074463
1.968	4.0053	0.014879
2.1806	0.041775	1.0639
1.7477	0.1286	1.8443
1.3794	0.03618	0.0083497
1.4529	0.0015993	0.22333
1.818	1.0202	0.01102
2.5289	0.0026789	2.176
2.1915	4.3796	0.73542
1.5011	0.04469	1.3843
2.3835	4.9801	1.5474
4.1197	3.9839	0.26897
2.939	2.1012	0.2316
3.6081	4.4155	0.051214
3.1052	2.51	0.12378
4.7136	1.6329	0.010073
1.4912	0.010506	0.59476
3.9129	2.6752	0.0078517
4.109	0.92126	2.6932
1.4703	0.17048	0.62215
3.8803	4.2579	4.1871
2.371	1.436	0.023958
2.2509	0.047815	4.279
3.8472	4.1822	2.3716
4.2775	1.4551	0.16676
2.2182	0.1682	4.14
4.189	2.112	0.27855
1.7241	0.64487	0.31758
2.8922	0.93778	1.6801
3.2945	3.2862	2.3507
4.1432	0.0012909	4.6992
2.4738	0.31125	4.6321
1.5885	0.94086	0.02365
1.6131	0.24773	0.19306
2.7802	0.99088	0.0010017
1.4694	0.10704	0.044724
2.1387	1.3985	0.099093
1.6057	0.0018079	0.57157
1.9012	1.291	0.029499
2.2031	3.7719	3.9494
2.0079	1.2172	0.076291
1.9868	0.0091535	0.93414
3.1795	2.0528	0.11507
1.5523	0.0068226	0.59666
3.2263	2.9108	0.015928
2.4751	3.5454	0.0030576
1.5231	0.016073	3.1671
1.5925	0.59948	0.0020066
1.8988	0.19811	0.57774
3.4567	1.805	0.089136
1.3592	0.03045	0.030537
4.8079	3.2011	0.048441
4.9105	1.9027	0.0057844
2.9427	2.4647	0.7167
2.0904	0.42107	3.4867
1.4628	0.0032302	0.80552
2.2378	4.6764	0.67419
2.1327	0.36994	0.099786
2.1478	0.21831	3.0115
4.1561	2.1839	0.0014338
2.8411	0.16962	3.8379
1.6104	0.38005	0.0016371
1.4981	1.6734	0.0032822
1.4233	3.0133	0.0032923
2.8119	0.0012542	3.2389
1.5764	0.18362	0.018139
4.5596	2.8923	0.042964
2.0082	0.22704	0.7348
4.3621	1.5798	2.2416
1.3548	2.6954	0.043452
2.5851	0.36001	1.9737
1.7701	0.67356	0.034259
2.2605	3.424	0.0060198
3.2972	1.1412	0.098447
1.3803	1.114	0.14945
2.0107	0.26558	0.99047
3.1281	0.092119	3.5871
1.3549	0.27591	0.10888
1.707	4.7493	0.91655
4.5398	3.1461	0.0084237
3.2944	3.776	0.047254
1.6892	0.010816	0.44852
1.3516	2.2435	0.49933
2.42	2.2668	0.92405
4.268	2.2323	1.4196
2.977	1.3082	0.10174
2.1023	1.3329	0.0068271
1.3665	0.15961	2.7213
3.5425	0.86517	4.6618
2.5994	3.2527	0.53153
4.9359	1.1558	2.9977
4.5846	4.7012	0.0010433
2.1272	0.025073	0.97719
1.9845	2.5791	0.0018539
1.7741	0.3659	0.042663
4.1912	2.0362	0.0016092
2.6895	0.18569	2.6077
1.7095	0.0017497	1.2525
2.0457	0.803	0.0071275
1.8149	0.23359	0.6839
2.6137	1.009	0.15793
2.2096	3.0385	1.0116
4.3727	3.6388	0.0063969
3.253	0.012799	3.658
1.3888	0.39174	0.013427
1.5183	0.24136	0.0044924
1.8357	0.46828	0.0012187
1.3562	0.0065116	1.2237
4.2328	4.4996	0.088071
3.7485	4.3286	0.0018473
2.1509	0.50656	0.0029518
1.4384	0.05753	0.89362
2.1386	3.295	0.21676
2.3903	0.092901	4.7613
3.8265	4.4491	4.717
1.5886	0.76141	0.10303
2.1453	0.42735	0.56966
3.8815	1.8654	0.025686
2.0402	0.75249	0.41283
2.4963	3.4067	0.66157
1.6002	0.024956	0.56384
1.3545	0.016796	0.24738
2.2617	2.141	0.11873
1.4112	0.25605	3.4442
1.4498	0.47389	0.038745
1.4815	0.0010039	4.0882
2.5448	0.12054	3.0035
1.6867	0.30343	0.86311
2.0969	2.5801	0.12484
3.0153	1.2339	0.014274
2.4581	0.1021	2.3025
3.0933	0.89025	0.11775
2.27	0.0096159	1.337
1.7944	0.1819	0.18568
1.6383	0.016449	0.59997
1.9006	0.38167	0.32942
2.154	0.076667	1.8821
1.4959	0.21282	1.799
2.1979	0.010251	2.0194
2.7407	1.0019	0.038163
1.8584	1.3214	0.38869
2.7367	2.539	0.038905
4.9117	2.8586	0.013154
2.6017	1.49	0.66801
4.1083	1.9529	0.023711
2.1901	0.87375	0.4227
2.2726	0.59648	2.567
2.8946	0.028029	2.5309
4.8104	2.2012	0.11717
1.92	0.15568	1.0417
2.6859	0.002866	1.8597
1.4354	0.97815	0.72723
1.3506	0.046381	0.0031233
2.694	0.0036478	3.821
3.8698	0.2205	4.0843
1.8356	0.20061	0.81669
2.3438	4.1727	0.051167
2.3666	0.034171	2.6159
2.2248	3.376	0.024278
2.1203	0.32039	0.35305
1.7841	4.8718	0.2947
1.7496	0.41866	0.0061722
3.031	0.10174	3.4412
1.5702	0.18476	0.0057902
3.0977	0.96518	0.61931
1.6884	0.32376	0.0056274
4.2164	1.6472	0.039406
1.4735	0.42167	4.0043
1.7662	0.008028	3.59
2.0888	2.894	0.10393
1.6734	0.0029436	4.4953
1.7057	0.27418	0.26726
1.6624	2.4868	0.11069
1.5894	0.65889	0.74092
1.7041	0.84137	0.0018508
1.7705	0.23914	1.3621
2.8276	0.0026211	2.4367
1.3642	1.9504	0.3384
1.7388	0.005297	0.594
2.7314	2.8059	0.0034019
1.6776	2.5012	0.14721
1.9547	2.9146	0.0017161
1.9121	4.0714	0.11992
3.0947	0.8884	0.0032532
1.3649	0.27978	0.008349
1.8019	0.4426	0.22943
2.1683	0.0077735	3.8929
2.4536	4.1053	0.029987
1.9265	0.11009	2.0908
1.3717	4.3932	0.42212
2.1663	0.7906	3.574
1.911	1.1799	0.0023348
1.3841	0.7258	0.0057224
3.875	1.5449	0.0027729
2.1166	0.018761	2.4047
1.6376	2.8557	4.8828
1.986	0.0032364	1.545
2.74	2.1694	0.0047496
3.975	2.7875	0.0011576
3.0217	0.0027075	2.9812
1.6696	1.2559	0.034657
4.3558	1.1301	4.4182
1.4886	0.18403	0.28821
4.2897	3.0621	0.0010653
1.7649	4.9458	4.1483
3.4218	2.8267	0.0010608
1.7763	2.4996	0.0022082
2.9456	4.0401	4.8266
1.8172	0.093963	0.47254
4.5674	0.66174	1.7537
1.4182	2.0944	2.1593
1.4397	2.4112	2.8225
1.8299	0.0012618	2.7176
2.8172	0.0069938	3.4796
1.807	4.6952	1.2162
1.8705	1.5301	0.0018866
1.9905	4.4481	0.08899
1.3781	0.0019353	1.0301
2.0569	0.0018761	2.7403
2.8089	2.1048	1.0572
2.0991	1.4033	0.014875
1.8289	0.049235	2.7874
3.8111	1.7868	0.023005
1.4079	0.0057856	0.1179
3.8047	1.3	0.0017819
3.577	1.0506	0.25828
2.6931	0.28661	0.88733
2.8885	0.0015596	3.8385
2.408	2.3332	0.0061237
2.7727	0.047546	1.954
1.4118	0.084719	1.2497
2.6926	0.75325	0.37387
2.2024	2.961	0.13246
3.0783	0.75928	3.6537
2.32	0.019399	1.5565
2.7909	0.61672	0.66901
1.3879	0.086902	0.0037768
1.7118	2.0143	0.0018199
1.6448	0.96338	0.65848
1.701	0.74903	0.11563
3.9261	3.2171	1.2476
4.0284	1.6248	0.040598
1.5502	0.24651	0.16131
2.1005	4.4236	0.28001
3.9471	0.69847	1.6681
2.861	2.6798	0.0047247
1.8971	0.058861	3.7706
2.7066	0.19197	1.7276
1.935	4.9444	1.2784
1.4789	0.0014434	0.34137
1.6366	4.9136	0.011963
3.83	2.1232	0.022417
1.4544	3.1415	0.15679
1.9656	3.1514	0.0050659
1.3639	0.55406	0.11627
1.8316	4.7075	0.0011591
1.428	0.60884	0.0039311
2.7541	0.67565	0.081434
2.7987	0.89365	0.072177
2.8551	0.98235	0.0069591
2.4344	2.2463	0.001358
2.0437	1.2461	0.015801
2.7168	1.1528	0.33962
2.1073	0.51342	0.0028237
1.8365	0.90734	0.010317
3.2485	0.86595	1.3215
2.7157	0.63253	0.32243
2.7496	0.15489	3.8253
2.0636	3.7379	2.5633
1.6843	0.018915	0.77667
2.2591	2.4127	0.0013342
2.1975	1.1595	0.0011514
3.3853	2.0221	1.1993
1.3617	0.022314	0.0031209
1.363	1.6034	0.0019336
2.2299	4.1226	0.067172
1.4445	0.0081965	2.2636
4.3626	1.799	0.46999
3.1674	4.9392	0.0048686
2.2461	2.0674	0.0013349
1.8519	3.4505	0.73938
1.9527	0.38417	0.010357
2.0755	1.7828	0.076412
3.3048	3.8932	0.0019961
2.8162	2.1718	0.41712
1.8615	0.020366	4.1463
1.4631	0.53178	0.17403
1.9662	0.036013	1.9711
1.4364	0.24775	0.013779
2.1714	0.3062	0.41955
3.9084	1.1573	0.54233
2.2401	0.81384	0.014279
2.3365	1.1746	1.9533
1.742	0.13792	0.2397
2.2471	1.9216	0.12287
1.6136	0.011982	2.8201
1.5766	0.079746	0.57014
3.7003	1.4754	0.010919
2.174	0.02167	3.0891
2.3007	0.4515	1.9646
3.0477	1.9546	0.10874
1.6738	0.011312	0.88679
1.3962	0.13705	0.0088666
1.3827	2.5978	0.0016725
2.0684	4.58	0.0018162
2.305	0.81068	0.12767
1.6192	0.034559	0.44736
1.5031	0.25799	1.2613
4.079	3.7803	0.015135
1.617	0.18623	4.63
2.0664	0.71122	0.80882
1.4568	0.028017	0.20544
2.8133	3.1546	0.061532
2.1056	1.7754	0.11383
1.848	0.11522	1.4609
1.7801	0.0021826	1.041
3.4286	4.2177	3.2667
1.4006	0.96477	1.732
3.765	0.25271	2.2009
4.5291	3.3056	0.024893
2.3096	0.46811	3.9326
1.6899	4.8604	0.022459
1.629	1.3313	1.0604
1.651	0.99603	0.0046637
2.4462	0.1846	2.7188
1.7854	1.6517	0.38015
1.8809	0.0017058	2.1653
3.2456	1.0607	0.094322
1.87	0.32583	4.2887
1.8844	0.0092049	3.3541
2.2178	2.6175	0.038921
1.3769	1.1752	1.0678
1.8569	0.5277	0.032325
3.03	1.3564	0.0026859
2.0397	2.0865	0.42203
3.3858	1.2337	1.0722
2.3688	0.01785	2.6759
3.0554	3.7856	0.094152
1.4485	0.3737	0.29051
1.61	0.020636	2.9312
3.3825	0.19192	4.7681
1.6519	0.0068554	4.2095
2.6761	1.5165	0.041571
1.4475	0.36951	0.015988
1.4572	0.89162	1.6186
1.5869	1.4496	0.0011088
2.4381	0.64263	0.017612
2.9649	4.5654	1.2093
1.8601	3.3127	2.2843
3.3833	3.0677	0.35875
2.5928	0.0029855	3.2746
[truncated: 4,214 more rows]

## Sheet: OO 6682
k1,k4	k2,k5	k3,k6
1.511	0.3018	0.0054954
1.9045	0.38182	0.0072657
4.0933	0.82796	0.06157
4.0944	2.9857	2.8825
3.1548	0.83736	0.013982
1.7215	0.3736	0.0037385
3.1855	0.6981	0.19487
3.388	2.5305	4.1559
4.5739	1.1503	0.027777
1.4689	2.1088	3.3575
1.7172	0.45496	0.070527
1.2363	0.23927	0.0019944
3.6011	0.74244	0.13361
3.9184	0.91992	0.097635
3.6576	0.79524	0.14853
0.98017	0.86978	1.034
4.8106	1.3752	0.13146
0.90458	3.3425	0.029659
4.4531	3.0985	3.484
3.5704	1.0075	0.039723
1.7396	1.0223	1.0664
2.4188	0.5405	0.0012459
3.7415	0.91816	0.034327
2.2233	0.47756	0.0034287
3.957	0.79625	0.0041374
4.84	1.4114	0.42442
3.6341	3.7503	4.1141
2.9697	0.76871	0.001175
1.9034	0.52243	0.32476
1.5078	0.29815	0.0081707
4.9318	1.1866	0.084793
1.9331	0.36028	0.0047866
2.8267	0.57188	0.0049497
1.898	0.82303	0.76355
4.0749	1.0881	1.4498
3.0247	0.72817	0.22043
3.9106	1.0041	0.01054
2.8584	0.53691	0.0044321
3.32	0.65917	0.0094621
2.5954	0.53912	0.014151
4.0546	0.78825	0.020413
2.8547	0.67395	0.038859
2.4123	0.53185	0.0015847
4.6476	3.1338	1.9666
1.86	0.39916	0.032412
1.1519	1.819	2.5711
2.7308	0.76419	0.001453
3.9337	0.62893	0.0087237
1.4062	0.30924	0.0048479
1.5429	3.0218	4.192
2.0044	0.70453	0.61563
3.7704	1.0631	0.89959
3.653	2.2747	4.4328
3.1599	0.75021	0.0011047
2.917	2.3064	3.6576
2.8222	0.53812	0.0021888
1.3039	0.29341	0.062299
3.9751	0.61825	0.0021882
1.8644	1.0689	1.4021
1.8388	0.87289	0.65332
1.7642	0.37172	0.011907
2.3833	1.1039	1.6592
4.0229	1.279	0.44801
1.9235	0.47923	0.01301
1.8952	0.55874	0.10303
2.7012	0.82314	0.17837
2.1448	0.51446	0.099768
2.3533	0.46357	0.084825
4.981	1.3827	0.0016328
4.5331	1.0669	0.4726
2.057	1.8515	3.0254
3.8517	0.6434	0.078309
4.2791	0.70746	0.001705
2.0602	0.39743	0.0067597
2.5918	1.9659	2.2917
1.926	0.35922	0.0011396
4.8891	2.471	1.809
1.4328	0.61389	0.61993
2.6206	1.1908	0.71946
1.4879	0.31461	0.0086468
4.1721	1.4629	1.7843
1.3052	1.2972	2.2701
4.9165	0.75213	0.0018085
4.901	1.9144	1.1536
2.1877	0.6172	0.041009
3.6712	1.6507	0.94657
1.9071	0.42994	0.0329
1.9136	1.7792	1.9788
2.5494	1.2389	0.80303
1.2627	0.25843	0.0034157
1.839	0.44972	0.084114
1.1869	1.1269	1.1843
1.6758	0.36173	0.0030396
4.4664	0.75672	0.11628
0.91647	1.8881	0.022503
3.0995	1.0088	1.2937
0.90988	2.5947	0.21795
4.6775	1.252	0.033442
3.3517	0.67976	0.09368
4.7622	1.5934	0.28593
4.861	4.1874	4.9223
1.7499	0.41461	0.0014158
3.1044	0.65554	0.043352
0.91804	2.503	0.027847
3.5378	1.0726	0.033103
2.7837	0.79723	0.0032061
1.6993	1.136	1.0682
3.8508	0.8898	0.0014632
1.8396	0.47076	0.040481
2.619	0.74765	0.011718
2.1459	1.4853	2.0205
3.388	1.4419	0.78183
3.1646	0.58288	0.0077287
3.5018	0.7156	0.003445
2.7469	0.55834	0.024795
2.3271	0.42136	0.0025388
4.8688	1.2051	0.04612
4.4827	1.4524	1.1674
2.5547	3.7852	4.3312
1.916	0.37223	0.0018209
3.8306	1.0848	0.0056382
3.3889	4.2992	4.4315
2.6823	0.89938	1.0588
2.6884	0.61642	0.0011069
3.804	1.9348	1.2803
2.8968	1.6425	2.038
4.9464	1.9356	0.77901
1.4456	1.5221	2.1908
2.96	0.70061	0.026537
0.89282	1.0978	1.5472
1.956	0.38803	0.010324
1.9976	2.5389	2.6413
1.996	0.49661	0.013546
2.7299	2.6063	2.7883
1.8457	0.54798	0.40399
3.4119	2.6839	2.4818
4.5009	0.93145	0.11637
2.7577	0.55532	0.013182
2.4396	2.4544	3.7958
3.6244	1.3131	2.207
3.2894	0.97613	0.1204
3.234	2.0852	1.6761
1.2185	2.7808	3.4994
3.8125	0.88239	0.01286
2.4594	2.5167	2.6356
1.8627	1.0062	1.1747
3.838	3.6388	4.8462
4.2848	1.6253	1.3362
3.2298	1.8395	4.6958
2.9436	0.82402	0.47732
1.1674	0.25664	0.058548
1.9536	1.7969	3.9607
1.4388	0.28302	0.014669
4.0205	0.65713	0.013168
3.9035	0.65739	0.0057591
2.7199	0.53832	0.0032106
1.9745	0.63211	0.62492
2.9726	0.80094	0.17101
2.2732	0.89462	0.33662
4.6853	1.643	2.0476
2.3618	0.51105	0.0024542
4.1094	1.0069	0.0050827
4.2476	1.0348	0.022245
1.7207	0.49228	0.31818
1.4776	0.89191	0.71843
1.7776	0.63808	0.35426
3.9567	1.0581	0.030962
3.0775	0.96394	0.56231
1.6112	0.51285	0.39688
0.91773	0.8682	0.0010031
4.049	0.96847	0.0045828
2.8441	0.74945	0.014118
2.7495	0.90961	0.27009
3.6056	1.7246	1.145
1.6175	1.6521	2.1312
2.9496	0.55591	0.0027335
2.4449	1.2574	1.0078
4.9718	1.0737	0.10718
1.6841	0.64131	0.43063
3.2261	0.67493	0.2049
3.9244	1.6094	0.83421
4.636	1.7818	0.77083
2.6744	1.3766	1.3148
3.3509	1.7815	1.2716
1.3284	1.8037	2.3944
3.9092	1.3555	0.40008
2.4487	0.48071	0.078154
1.9708	0.87407	0.93404
4.1992	1.2575	0.60715
4.0548	1.1383	1.064
1.4625	1.2015	2.2498
1.5791	2.276	4.6315
3.7894	4.0432	4.2541
1.3348	2.1799	3.3496
3.215	4.2751	4.7097
4.0735	1.0352	0.034753
4.7089	0.97765	0.029634
2.2441	1.826	1.5707
1.8271	0.8934	1.1334
1.6981	0.44987	0.11019
3.1642	0.98237	0.12374
2.2366	2.538	3.925
3.0601	0.7857	0.005466
1.7139	0.39561	0.011428
0.97134	2.8707	4.269
2.9649	0.92635	0.098337
4.2974	1.1567	0.024135
3.2058	3.0748	2.9473
0.75777	2.684	4.2737
4.5429	0.95506	0.060635
4.9073	0.88062	0.093015
2.3111	0.76348	0.25639
1.4927	2.0748	3.7741
1.0095	0.39488	0.33066
3.5619	0.65768	0.10569
4.1483	0.98944	0.0022896
4.1634	1.9009	2.9335
2.4351	2.0316	2.1573
3.7251	1.4353	1.4864
4.7987	3.3562	2.8649
3.4738	0.95326	0.0024211
4.9987	1.1717	0.0039971
3.4702	0.68757	0.0028154
4.5509	0.69427	0.01778
1.5569	0.66095	0.5018
2.4478	0.57614	0.032641
1.7446	0.33639	0.0042055
2.7815	1.1075	0.51334
2.2424	1.2386	2.2338
3.4177	1.2247	0.2755
2.4998	2.9709	3.788
3.7756	0.88162	0.26736
1.1409	1.6959	2.0363
2.7922	0.48311	0.0047935
3.1554	0.67278	0.040254
3.5155	1.0882	0.075424
2.6021	0.54161	0.019162
2.3615	0.5143	0.059982
0.88403	2.2422	4.0392
2.5712	0.48301	0.0089591
1.8483	0.40884	0.020177
3.1878	1.8107	1.4542
1.4403	0.65005	0.60939
4.5217	1.1196	1.5759
1.2625	1.9181	3.9718
1.4919	0.31084	0.011211
4.0238	1.0946	0.017664
3.6247	0.99422	0.0028729
2.8181	1.4144	1.618
2.9403	0.86041	0.27139
2.1059	0.73667	0.65124
4.6582	1.1396	1.4021
1.8393	1.1072	1.9515
4.4632	1.1669	0.14236
0.90694	2.9618	0.10898
3.4844	1.3196	0.46511
1.4088	1.6074	3.9282
4.0723	1.2152	0.0080751
3.9603	0.70724	0.0074835
4.2517	1.239	0.033836
1.9539	0.76391	0.45125
2.4035	1.3049	0.87466
2.8933	1.2083	0.50019
3.0598	1.4334	2.8932
3.4238	0.63904	0.0015609
2.9319	1.6413	4.2517
2.9462	0.84546	0.0036966
1.504	0.3288	0.068014
2.4802	0.9706	0.71728
1.5687	0.36268	0.0010552
4.8364	1.2103	0.0043241
3.5325	0.66386	0.0019243
1.2214	0.24243	0.014847
2.6665	0.45909	0.0010549
2.3178	0.83719	0.53469
4.6771	1.2143	0.079512
2.829	1.9606	2.5337
3.3374	1.6436	0.96999
3.1351	0.65113	0.012576
2.6334	0.47626	0.029173
4.2664	1.7125	4.3637
2.5932	1.7224	3.7713
3.2188	0.8403	0.0014471
1.2829	0.40936	0.19016
1.2143	0.22631	0.0028425
0.91962	1.2257	0.0028203
3.411	0.84189	0.025459
4.6931	0.804	0.014759
1.167	0.22587	0.013984
2.6352	0.93918	1.2068
1.8265	0.35505	0.0074498
1.031	1.9878	4.0628
2.0934	1.0832	1.5437
3.7526	0.60026	0.0021994
1.9606	0.45014	0.024276
3.952	1.0302	1.2008
3.2836	0.73621	0.0019823
3.184	0.53333	0.0042335
1.4518	0.39696	0.098098
2.0654	0.56715	0.24323
3.4536	0.99016	0.36089
3.4962	1.0545	0.34052
3.1082	0.79401	0.098456
1.5845	0.4403	0.10547
2.7349	1.3915	2.5298
2.5699	0.5036	0.091311
2.1937	1.159	1.2785
2.5724	0.66902	0.02439
2.5533	1.1439	0.52431
2.802	0.72912	0.0011239
3.3354	0.71199	0.015797
4.1919	1.1803	0.0064916
1.6723	1.9419	2.9537
1.8089	0.6762	0.44707
1.1371	1.3043	1.4605
3.5865	2.2669	2.4057
4.5117	1.4376	1.1091
4.4841	1.5768	3.0931
1.6845	0.32539	0.0085046
1.7686	0.74844	0.88047
3.4839	0.61998	0.1156
4.7835	1.671	0.38844
2.6411	0.56874	0.03064
1.5849	0.71989	0.52646
4.1071	0.66324	0.011119
3.5799	0.99206	0.19641
2.0373	1.2666	1.4606
4.9892	1.2482	0.0055888
3.1214	0.98296	0.32944
3.192	0.78957	0.042368
1.4603	0.32492	0.0025408
2.9653	1.5391	2.4144
2.2012	0.88575	0.98519
2.1712	1.5107	1.8569
3.9037	1.8863	3.3227
2.5127	0.91728	0.26063
4.1022	0.71042	0.0024646
2.3678	0.47508	0.04883
1.8255	1.1665	1.8201
2.9824	1.9713	3.8384
0.91836	1.7889	0.0015693
1.7007	0.35817	0.035477
3.7161	1.975	1.6974
3.9446	3.7107	3.1807
3.647	1.8264	1.7257
4.4302	0.99475	0.09188
3.1304	0.58185	0.072772
3.1916	2.4083	1.8298
3.2665	1.8634	3.4983
4.4295	0.86778	0.043861
4.8018	0.97728	0.22666
3.5275	1.2998	1.2
4.2619	0.85009	0.0017854
1.5366	1.2617	1.4731
1.4247	0.32841	0.048023
2.0733	0.37741	0.0011092
1.3754	0.50653	0.39357
1.0582	0.19797	0.016387
4.2271	1.0934	0.0086012
1.4119	0.32019	0.0097515
4.3481	1.6315	1.4136
3.1645	0.89876	0.20738
1.2713	0.28099	0.041693
1.5359	0.30515	0.0012579
3.9401	0.72572	0.0124
2.2845	0.94455	0.68573
3.0246	0.62602	0.032552
2.3908	1.5156	2.5088
3.0644	0.67456	0.43589
2.6323	1.007	0.60148
3.5744	1.7692	1.0009
2.6946	0.93465	0.90683
3.5989	0.68233	0.14524
2.7757	0.58484	0.096368
2.4162	0.44974	0.0014806
0.96593	1.1666	1.9272
1.9628	2.4435	3.8686
1.005	1.569	2.8193
3.5833	0.76443	0.0010237
4.9667	1.0078	0.11763
2.3127	0.71883	0.75131
1.4982	0.29609	0.0012963
1.7819	0.40654	0.099064
3.148	1.5309	1.9783
1.3084	0.26152	0.013148
4.6292	0.86866	0.0017132
3.0356	0.71107	0.028902
2.773	0.55681	0.04322
2.956	0.77687	0.052605
4.026	1.6912	2.2894
1.9088	0.36073	0.0017753
2.7846	0.5423	0.0071948
3.778	1.5416	1.2247
2.7082	1.0256	0.33482
1.7555	1.9684	3.5354
2.9009	0.51569	0.0048692
4.0876	1.0569	0.0096901
4.1659	1.1348	0.56429
3.9989	1.5661	1.1748
1.4448	0.30185	0.0036363
4.4911	2.3089	1.2701
1.2921	2.6055	3.8035
4.8312	0.7912	0.0017025
2.4521	0.76827	0.12334
2.3834	0.48836	0.0042738
3.1099	1.1523	1.7989
3.7657	1.069	0.35241
2.2672	0.62087	0.0027593
3.9159	1.7286	1.2486
1.7012	0.68106	0.53446
3.5127	0.70474	0.0090066
2.5311	4.4882	4.9252
2.3056	0.45418	0.0043922
1.0658	0.54532	0.59571
1.4415	1.6985	1.9946
4.2234	2.5168	4.6684
2.5385	0.61192	0.055137
2.0786	0.39817	0.0095762
1.9138	0.44276	0.14924
2.8502	1.6001	3.5202
2.5302	0.67612	0.0015644
2.5531	0.63832	0.33276
3.3019	1.3039	0.88763
1.9398	0.54286	0.04656
3.3616	0.9075	0.0049613
2.2945	1.5671	3.1595
0.8623	1.5129	2.3382
2.2077	0.9332	0.769
1.6421	2.7423	3.4883
4.5723	0.99945	0.0022253
3.4706	0.87027	0.017067
4.6585	2.0602	3.7055
0.90421	3.5031	0.011172
3.379	0.6599	0.03199
1.9239	0.48376	0.003358
2.5869	0.65858	0.014696
1.7515	0.50907	0.17491
1.7323	1.4793	3.0396
2.9915	0.81961	0.082118
2.5051	0.55077	0.064386
3.2875	0.73778	0.0057635
4.5666	1.0831	0.0023686
4.0794	2.9819	2.2673
4.4352	0.73008	0.034944
4.971	0.90499	0.024287
1.6812	0.6648	0.67815
2.4217	1.7326	2.873
1.0432	1.3266	1.7562
2.4712	1.0219	1.1017
3.4793	1.2765	0.30211
3.7209	2.3905	1.8938
2.2546	0.94698	0.5912
3.6827	1.0837	0.0012093
3.2738	0.77711	0.0031682
3.4633	0.68361	0.021964
3.96	1.1304	0.070149
1.6783	0.50004	0.11085
4.5852	1.0956	0.014302
4.9774	1.2898	0.19704
0.87624	2.7769	4.285
2.0253	0.9577	0.65394
2.306	0.44413	0.0017303
2.4131	2.4616	4.8016
1.7593	0.36525	0.0173
2.3503	1.241	1.6334
4.2178	1.3608	0.25171
1.7005	0.4179	0.0037775
2.2731	0.60549	0.045639
3.3209	0.80653	0.031687
2.1436	0.42049	0.022441
4.5196	1.8423	4.7204
3.9195	0.76591	0.13774
1.7626	0.85121	0.51847
4.4786	3.3262	2.3403
2.896	0.54262	0.01949
1.6895	0.34608	0.01009
2.806	2.146	2.1622
4.012	0.70573	0.12935
4.7501	0.95546	0.0010408
3.0289	2.9587	2.5517
2.4161	0.9361	0.40599
2.4186	0.44204	0.0049549
3.9938	0.87678	0.1849
1.4391	2.0701	3.732
1.7587	1.1563	0.94674
1.6026	0.35619	0.0091743
3.8862	1.1258	1.6102
1.6686	0.34002	0.031783
4.4837	1.0523	0.0012416
3.3281	0.58107	0.0091876
1.7328	2.3238	3.9836
2.0705	0.40073	0.0087681
3.2937	0.56845	0.0025069
3.1633	0.74392	0.015708
4.4148	1.224	0.0052107
3.0709	1.0171	0.96643
4.5293	3.0259	4.9829
2.7344	0.99093	1.499
2.0068	0.4488	0.0021088
3.9141	0.79768	0.021337
4.2021	1.0493	0.0043853
3.9132	1.9766	3.3426
4.2703	1.6549	4.3469
1.9396	0.39735	0.0096425
1.6957	1.3631	2.5183
1.5897	0.44274	0.27687
4.4223	1.5062	0.26997
2.5111	0.45803	0.0018099
3.1058	0.67287	0.0011007
3.8418	1.0623	0.0089414
2.0486	0.7557	0.90692
3.21	0.78469	0.065371
2.1127	0.43812	0.057082
4.1016	0.95093	0.72386
2.9108	2.4276	1.9524
2.2042	1.585	1.8876
4.675	1.0553	0.0012828
2.3206	0.86574	0.28559
4.5419	1.1012	0.70633
2.8843	1.2678	2.4998
2.2486	1.1846	1.9243
2.9154	1.5277	0.90885
1.0964	1.587	3.2302
3.2606	0.70659	0.022446
3.323	1.0203	0.87579
1.8646	0.40855	0.063876
3.3747	1.2269	1.4413
3.6763	0.7135	0.0079731
3.2263	0.6116	0.032269
1.667	0.60721	0.4589
3.3927	1.0971	0.76903
3.1522	0.92479	0.0064119
3.4696	1.2525	1.3553
1.7267	0.32877	0.0052231
3.7067	0.70128	0.071973
3.9041	0.68615	0.0014484
4.8452	1.007	0.083375
0.91056	1.2799	0.24393
1.9651	0.99315	0.96832
1.9289	0.52865	0.074065
1.5965	0.48345	0.13705
4.3521	2.3522	2.1961
4.6549	0.96348	0.15434
3.3001	0.84901	0.24468
3.2228	0.91062	0.050115
1.8639	0.37046	0.048956
3.8384	0.66018	0.021665
2.2446	0.53526	0.068731
3.6804	0.67722	0.0022965
1.9765	0.51696	0.0016338
3.4071	2.3259	3.5475
3.7088	0.81924	0.5563
1.6036	0.34931	0.032619
4.1448	2.2932	3.352
4.6221	0.8012	0.08935
0.8965	4.305	0.0069024
4.7826	1.0298	0.0056666
4.3156	1.2214	0.034493
2.2609	0.43348	0.020868
2.9692	0.80482	0.0013183
2.7243	0.92919	0.98167
4.7878	1.3307	0.92463
2.825	0.85728	0.094684
2.0214	0.50081	0.035063
4.2385	0.66297	0.043144
2.1617	0.59988	0.078916
4.3929	1.0835	0.0039509
4.4209	0.84703	0.44713
3.8193	0.76347	0.002529
2.0154	1.2961	2.2886
3.5911	0.98902	0.021775
1.1496	0.21769	0.0071085
2.0409	1.2983	1.7816
4.6451	1.4596	0.55957
3.6787	1.6791	2.3651
4.8852	1.037	1.1396
3.3357	0.7947	0.0020996
2.5974	1.6963	3.3002
3.5855	0.87776	0.00108
3.0605	1.763	2.6753
3.0516	0.56792	0.017324
3.1304	0.58167	0.017648
1.8703	0.38537	0.0016762
1.6808	0.94855	1.4471
1.7835	1.7347	1.6017
3.0315	1.4282	1.5505
3.7478	0.60264	0.0014311
1.8984	0.51744	0.054512
1.9475	0.99812	0.92774
2.0784	0.58271	0.040613
3.8133	0.71422	0.076818
4.917	1.3295	0.052243
4.3071	1.0293	0.078171
4.1175	1.1454	0.0029448
0.90502	2.702	0.010123
2.635	1.0545	0.98095
1.4882	1.4163	1.609
2.9274	1.3338	2.3381
2.7792	0.55156	0.0013111
3.0987	0.81422	0.001551
4.6888	1.3463	0.0010732
2.5714	0.59718	0.0011137
3.9945	3.2218	2.7475
1.6542	0.31321	0.0010124
4.6483	1.0448	0.034479
4.4554	0.94632	0.14849
3.6867	0.92933	0.17562
1.8317	0.35383	0.0064321
1.2942	0.57729	0.60079
2.5893	0.59017	0.0017978
1.2969	0.64897	0.51211
4.0438	2.3971	3.5783
3.9288	0.83625	0.12639
1.2275	0.25067	0.005245
3.1583	0.72317	0.0010023
1.8927	0.58112	0.34175
3.1774	1.5227	2.6146
3.7843	0.91539	0.036526
2.5648	0.5521	0.15948
1.6867	0.46515	0.30303
2.4395	0.57525	0.012437
1.8108	0.44914	0.032784
2.1844	0.46395	0.0094901
4.346	1.6173	1.633
4.9908	1.4623	0.17092
3.7393	0.69306	0.0018553
4.5776	1.0546	0.028047
4.0782	0.89236	0.86623
2.373	0.65255	0.044048
2.204	0.69807	0.31463
4.3693	1.1886	0.0032644
4.5461	1.5436	1.7615
2.3734	0.71655	0.087828
3.5518	1.0187	0.8237
3.1113	1.8078	2.1265
2.5468	1.664	1.5347
1.1771	0.22425	0.010046
1.3227	0.74965	1.0278
0.91793	1.3143	0.016736
1.7185	2.6948	2.8623
4.5927	0.92271	0.73719
4.1096	0.80543	0.22783
3.7959	0.79553	0.12122
2.9934	0.74667	0.0016413
4.7717	2.0519	0.96989
4.3283	3.3239	3.9586
3.1897	0.72336	0.21294
4.3656	1.0923	0.016358
1.3227	1.9759	4.5431
3.2936	0.55149	0.036819
1.4694	0.31781	0.030468
3.0742	0.52072	0.0013306
2.8402	0.65564	0.35398
2.8948	2.7481	3.1564
1.5754	0.3121	0.015739
3.3688	0.68891	0.056349
2.443	0.45623	0.059789
1.4289	0.43157	0.28178
3.861	0.72669	0.0096339
1.8378	0.74734	0.46369
0.9162	1.9454	0.14243
4.63	1.4197	0.0024983
2.1603	0.52393	0.0063113
4.8442	3.3188	2.469
1.5967	2.5572	2.8564
1.5677	0.59413	0.58283
4.1307	2.4029	2.7191
1.3767	0.30444	0.0097088
4.0759	1.1834	1.4907
2.5546	0.49632	0.0021432
4.7167	1.3295	0.12537
4.3922	1.2198	0.016046
3.7166	4.2801	4.9898
3.7069	1.7905	0.86152
4.3843	1.1582	0.023012
2.0891	0.47498	0.0061276
1.5774	2.9591	3.3425
1.3533	1.1481	1.7693
4.5826	1.3937	0.0023861
3.5341	0.82824	0.02273
1.4206	1.544	2.2141
4.7694	1.4401	0.044248
3.8754	0.86962	0.12649
1.945	0.40954	0.030137
2.3641	0.56951	0.28769
1.167	1.9456	2.7987
4.1108	0.74425	0.039356
2.04	2.1961	4.3981
1.318	0.27977	0.0026103
4.683	1.8389	1.0635
3.1411	0.55492	0.021999
3.2325	1.0088	0.94282
1.564	1.3102	2.7327
3.6972	2.3313	2.8122
2.7436	1.6025	1.5892
1.5859	1.9643	4.9918
1.1424	0.44322	0.37415
2.1785	0.51609	0.015227
1.8537	0.45842	0.0033566
3.9664	0.82387	0.052549
3.5889	1.245	1.458
1.4923	0.2941	0.0048283
4.1931	2.1353	2.6479
4.2482	1.0439	0.0068348
3.4816	0.67476	0.007055
4.9803	3.0934	2.6403
4.4629	1.3175	0.21995
1.8602	0.42324	0.047853
2.3418	0.67198	0.033111
3.2599	0.86492	0.0253
2.016	1.5952	2.5744
2.5617	1.915	3.3043
2.5799	2.5068	4.6889
1.6691	1.9768	2.9572
1.8045	0.76934	0.84889
2.0361	0.48249	0.17897
1.777	2.2836	3.3521
1.7317	0.42007	0.11851
1.8959	0.86872	0.73212
2.1306	0.83854	1.0764
3.9712	0.91018	0.004889
2.4443	0.62361	0.07825
4.6305	1.3964	0.0048087
2.8391	1.1474	1.3377
4.909	0.8841	0.032851
3.9735	0.66496	0.003254
4.5185	1.5998	0.98867
4.6031	2.2048	3.7605
0.96497	1.4559	2.1276
2.4846	1.1067	0.74797
1.5615	2.0499	4.556
4.4749	1.3132	0.03695
1.8677	0.34776	0.0042431
4.2081	0.89121	0.023142
2.1634	0.56603	0.026272
2.2851	0.6086	0.0019388
1.5333	2.9744	4.2069
2.1097	0.41202	0.048415
3.5303	0.73192	0.0041954
3.12	0.92822	0.50495
3.3864	2.7203	2.3528
0.91107	2.6484	3.6299
1.6059	0.35075	0.016657
1.3218	2.2418	4.1811
3.8043	1.108	0.013941
4.1948	1.2901	2.1747
1.8775	1.4702	3.1334
4.2777	1.047	0.048482
4.2879	0.88847	0.64171
4.9537	0.75326	0.027101
2.9924	0.72807	0.0022425
1.0977	1.0086	1.2323
2.5529	0.81844	0.29147
4.2078	4.7734	4.5876
2.3888	0.54876	0.021543
3.9445	0.92418	0.053483
2.9111	1.5475	1.0905
1.6372	3.2921	4.0816
4.1861	2.2564	3.9648
3.0498	0.92517	0.42337
3.5485	0.58436	0.011933
1.9016	2.8709	3.7621
3.0129	0.54718	0.0016406
3.1164	0.80964	0.056875
4.7417	1.3163	0.0030308
4.9257	0.84799	0.042499
3.5246	2.6949	2.1082
2.8929	0.73105	0.015846
1.782	1.8559	2.0693
3.9624	1.0589	0.32167
4.2421	1.2061	0.1888
2.9867	0.60391	0.0015267
3.5487	1.203	0.25514
2.5859	1.6857	1.4191
3.623	1.2205	0.48242
3.8331	0.67521	0.11246
1.9192	0.46919	0.0030536
2.928	1.2256	1.7553
1.3136	2.4808	3.3518
2.5101	0.70302	0.19578
2.0687	0.51553	0.04017
1.2243	0.23914	0.020239
4.9297	1.5182	0.51673
2.9178	0.81299	0.052591
2.4974	0.59504	0.0017649
2.8248	3.4101	4.9179
3.546	2.8544	3.4176
4.8347	1.219	0.36583
3.6917	0.7166	0.12908
3.5611	0.89602	0.38629
1.5814	1.8258	1.9044
3.9441	0.95341	0.0033727
3.4799	0.86317	0.0064616
4.9719	1.3675	0.032967
3.3449	0.99572	0.021781
3.1823	0.79972	0.032484
4.8829	0.96269	0.07898
2.3634	1.1686	1.5413
2.4979	0.70934	0.01322
4.0734	1.0932	0.31082
2.7292	1.664	1.5077
1.2691	0.9212	1.4103
4.4665	1.1073	0.0012881
2.4437	0.44667	0.0011193
3.291	1.0305	0.091133
1.0805	1.1656	1.3893
4.3558	1.1398	0.0085711
1.8987	3.2069	4.8642
2.9302	2.0986	2.8061
4.7706	0.95966	0.70076
4.8169	0.89674	0.092321
1.276	0.43918	0.29117
4.6575	0.75717	0.20058
2.268	0.46994	0.054607
3.9479	0.97842	0.13929
4.1092	4.1232	4.5838
4.0627	0.66212	0.007136
1.5436	1.1627	2.1417
2.8659	0.70793	0.0014343
4.9141	0.76626	0.0038808
3.5776	0.66737	0.0068982
2.5375	2.4236	2.8508
3.6956	1.2202	1.0406
4.4084	1.3472	0.18143
1.183	0.94504	1.0169
3.0257	0.67516	0.034535
2.4171	1.0439	1.3009
3.3158	0.83356	0.0022125
1.7416	2.0297	3.021
2.0061	0.81575	0.47497
2.0109	0.72586	0.6852
3.7737	1.1077	0.0055965
3.1917	0.73697	0.50526
3.8491	0.77967	0.0070874
4.9305	1.2003	0.0093009
1.7422	0.77925	0.78547
2.4943	2.4705	2.8343
2.3401	2.773	4.269
2.3035	0.47234	0.05095
2.9431	1.4654	1.2294
1.5964	0.35447	0.021665
1.3168	0.32521	0.05873
3.6852	1.0154	0.0035098
3.0972	0.6675	0.001695
0.9827	1.5428	2.1252
1.2242	0.51471	0.49831
1.7615	0.3474	0.038302
4.2467	0.65155	0.0032373
2.8645	1.8206	1.4391
3.7813	0.64129	0.0041353
1.5926	1.3018	2.4402
3.5456	0.97294	0.0010516
3.6732	0.8371	0.095876
1.1105	1.0096	1.1716
2.2026	0.57136	0.048169
4.2013	1.0927	0.088842
4.2783	0.89487	0.29528
2.6898	2.6803	4.0373
2.1917	0.53806	0.0022352
4.4278	1.3102	0.030691
1.8203	0.46294	0.033957
1.064	0.64451	0.70669
1.6753	0.55471	0.17705
4.6076	1.3534	0.001227
0.99044	2.142	4.1104
4.3955	1.0521	0.022375
3.9674	0.82087	0.01704
4.0753	1.2329	0.011717
2.9414	0.76898	0.0022392
4.1835	0.70623	0.0031277
1.3294	0.33196	0.10071
4.5371	2.1351	2.4927
3.7758	1.8352	0.8811
1.6283	0.8316	1.0224
2.5257	0.71298	0.1485
3.0628	1.3168	1.3595
1.9921	0.53216	0.040478
1.1285	0.46568	0.44045
3.198	0.52897	0.0083285
3.217	3.5945	3.6271
1.2426	0.29771	0.10417
4.6652	1.199	0.0030337
2.9982	3.2184	4.1189
3.4383	0.71267	0.001428
4.4785	2.7063	2.5225
1.9292	0.48661	0.021315
4.6014	0.82899	0.45462
4.3035	1.8591	1.5291
2.2294	2.92	4.9848
3.2729	0.75125	0.0020284
2.1398	0.44769	0.0092641
4.0738	1.014	0.056698
1.7968	0.4412	0.19756
3.6931	1.703	3.8644
4.0986	0.99707	0.001894
3.8746	0.61596	0.0051081
2.333	0.53362	0.023587
2.8192	0.65407	0.0059308
4.9448	1.5119	0.38593
2.9881	0.83834	0.021284
4.902	1.1055	0.14962
4.4509	1.878	1.9548
4.4932	0.88467	0.0015526
1.8037	1.0157	1.273
1.672	1.3526	1.4092
1.1579	0.51542	0.39922
1.8748	0.42633	0.0020874
2.0101	0.41134	0.036717
1.5016	0.34665	0.002218
1.966	0.47365	0.094017
3.6461	0.61682	0.0010655
2.0737	0.49223	0.055889
1.0734	3.5099	4.5896
2.2483	0.51852	0.0021503
1.319	2.3604	4.1758
3.7336	0.74208	0.22215
2.1847	0.98524	1.4354
1.4482	0.30288	0.0017463
1.2544	2.6277	3.6007
3.6979	0.66884	0.0126
3.0383	0.608	0.004321
4.9395	1.0474	0.0091549
1.0333	1.2883	1.8951
4.6026	0.84099	0.10337
3.0053	2.9494	4.3274
3.3845	0.69555	0.27876
4.4223	0.96141	0.59755
3.2083	0.90907	0.0059154
2.1794	0.41724	0.0010054
4.4936	0.8917	0.066467
2.0098	0.52673	0.26407
3.8764	1.4679	1.3776
2.0133	0.47493	0.043464
3.1981	1.5892	3.7275
3.4457	1.0201	0.020602
4.65	0.73276	0.0019599
2.7148	1.1234	2.0201
4.7502	0.87958	0.062997
1.5787	0.32722	0.0045568
1.934	1.3552	1.2178
3.604	0.71947	0.039633
4.7232	1.2464	0.0084269
1.4971	0.39749	0.096556
3.9277	3.5284	3.3039
2.1771	0.55912	0.052743
1.9729	0.44145	0.10984
3.1995	1.0106	0.13742
4.6143	1.476	0.67162
2.4761	0.50266	0.010678
1.558	0.50812	0.24005
1.3767	0.26456	0.01006
3.1112	0.65744	0.02699
4.3808	0.76893	0.001039
3.6203	2.2904	2.5148
3.7182	0.82925	0.37832
2.0274	0.69461	0.33404
4.9124	3.4189	2.324
1.1118	0.52235	0.52507
3.7423	2.0236	3.8531
3.4861	1.2874	0.8334
2.7707	0.63818	0.11498
3.0788	1.1616	0.62918
4.1486	1.5316	0.9745
4.6239	2.6688	1.7721
2.005	0.4169	0.0038852
1.5986	0.38587	0.011819
1.2527	0.2452	0.017426
4.0091	1.6684	2.713
3.1571	3.6793	3.3063
3.3331	1.0019	0.043994
3.0866	0.71731	0.007242
2.4082	0.42996	0.0023076
0.99773	1.3708	2.1307
3.6072	0.86964	0.011336
3.0907	1.3498	1.9719
2.0024	0.59886	0.12579
2.2451	0.78901	0.29632
1.5203	0.2888	0.001425
3.5167	0.84275	0.29976
4.6529	0.85099	0.27305
2.4786	0.43538	0.001757
1.9034	1.1019	1.0115
2.332	0.97956	1.4939
1.9649	0.46223	0.0026158
2.6561	0.55101	0.032498
3.2493	3.5496	3.0947
2.757	0.79796	0.13976
1.6232	0.36509	0.0035071
3.6762	0.73808	0.082214
2.0034	0.44868	0.071676
1.9563	1.8707	2.4126
3.3118	0.65157	0.048204
1.1752	3.3422	4.8109
3.7884	1.4804	1.8311
3.0687	0.95188	0.23849
0.96412	3.2466	4.7815
4.5899	1.1006	0.098624
2.3476	1.2543	1.9685
4.4447	1.0773	0.013454
1.9695	0.56969	0.31009
3.722	1.0929	0.047213
4.121	0.77908	0.036873
0.91725	1.3872	2.026
2.3286	1.7591	3.9107
2.581	1.2189	2.3863
4.5841	1.6112	2.2504
3.5015	0.78318	0.061993
2.0384	0.47896	0.0012372
2.8247	0.49772	0.026918
2.9869	1.3336	0.77809
3.663	0.66137	0.023453
1.9589	4.134	4.9707
1.7115	0.37014	0.09726
1.7152	1.0041	0.75639
1.117	1.12	1.4355
0.98536	1.1131	1.5986
2.7299	0.47696	0.0013964
4.2942	1.3294	0.1094
2.4146	0.55133	0.02694
2.4455	0.45101	0.011665
2.5844	0.93409	1.2121
1.6958	2.3693	3.9569
3.5228	0.75172	0.0046166
3.7457	0.95782	0.10197
4.0397	0.90015	0.24067
4.5947	1.0992	0.02401
2.2397	0.50213	0.02096
1.1463	2.5128	4.5062
1.4945	0.92984	1.1792
1.2093	1.902	4.8612
2.4519	0.47673	0.027049
3.3318	1.6224	1.4876
2.401	0.78954	0.68439
3.9761	1.0829	0.0020103
2.6478	0.79107	0.059038
2.1703	0.78577	0.25454
3.372	0.67116	0.001102
2.4994	2.9394	3.5406
0.97555	0.94661	1.3679
4.8969	2.421	3.2206
4.1731	0.7492	0.021728
2.672	1.588	1.2344
3.3644	0.69641	0.039893
1.4457	0.29144	0.0012025
3.5084	0.75611	0.024388
2.8054	0.69169	0.0023001
2.7699	1.4258	1.8654
2.2126	0.62834	0.13229
1.6432	0.37247	0.0084154
2.2117	0.48767	0.015907
2.8483	0.7229	0.25366
1.8135	1.8797	2.0316
0.91162	1.7102	0.28392
4.1692	1.0199	0.066647
2.8171	0.51591	0.020169
3.5594	0.59823	0.022016
3.8351	0.94205	0.0027334
1.382	0.6829	0.64801
3.0985	0.77329	0.030127
3.5938	1.8257	1.6842
2.0619	0.63661	0.35175
4.2641	3.0372	2.1203
3.5613	1.0588	0.028359
1.2908	0.35291	0.14596
2.6142	0.51356	0.10111
1.399	1.1381	1.4789
1.1442	0.40539	0.25772
3.3128	1.5674	3.6607
0.9146	2.7107	0.14127
4.4013	0.78504	0.040758
3.1324	0.79633	0.32654
3.0852	0.5856	0.0011237
2.5784	0.60742	0.025907
3.1602	0.9083	0.22855
4.4465	1.5256	1.675
3.3756	1.1706	0.51581
2.9122	3.448	3.8947
4.8054	1.2715	0.0018486
4.1833	1.5188	0.40559
2.8075	0.65654	0.014336
2.9054	1.1185	0.75594
2.866	0.51345	0.060918
1.6265	2.0089	3.5543
3.5068	1.3731	0.59625
4.0907	0.97684	0.0025714
2.9688	0.7906	0.13242
4.9423	2.4756	2.2787
4.0908	1.0651	0.9392
3.9493	0.72753	0.0039363
3.257	1.2944	1.8735
3.8547	0.8797	0.0034391
4.6634	1.9256	1.6905
3.7555	1.0775	0.015105
3.1437	0.64011	0.10497
4.1394	1.6084	0.50796
2.8973	0.71678	0.27672
4.0658	0.86651	0.0086232
3.807	0.74136	0.012868
3.5302	0.58004	0.0024284
4.9691	0.90554	0.45277
2.7321	0.81562	0.29611
4.9962	1.4282	0.069853
2.1063	1.2054	0.82536
4.8977	1.2248	0.003829
3.9335	2.0101	3.2447
1.5094	0.38216	0.065812
2.8348	2.6378	2.6806
3.1986	0.58151	0.10148
2.7475	0.75511	0.011576
4.438	1.2274	0.23944
1.0816	1.133	1.9546
4.731	1.2609	0.0019884
2.9957	0.62042	0.0064784
2.9813	1.5286	0.9506
1.8837	0.49358	0.02829
2.583	0.44867	0.0023439
1.8646	1.4064	2.4422
1.382	2.3873	4.8542
3.1495	0.52867	0.0026341
4.4493	2.0429	0.92173
3.1461	0.63521	0.019974
4.7839	1.4521	0.0013817
4.2585	1.0226	0.027381
4.8165	0.79341	0.0041111
3.1083	0.66461	0.0050733
1.979	0.46111	0.0034925
1.7759	0.82426	0.64192
1.7266	0.37015	0.022678
3.8004	1.1728	1.3064
2.6188	0.51486	0.13926
3.7865	1.4503	1.4909
3.9267	2.2098	2.3769
2.3569	0.64248	0.20003
3.0783	0.67797	0.028081
2.218	0.47657	0.0035229
2.6277	0.6996	0.052403
3.9771	1.5226	2.1216
3.3132	0.75776	0.0032471
1.7523	0.36428	0.0014976
1.6265	0.90879	0.65814
2.0911	0.74559	0.54689
2.3294	1.6381	1.8461
4.4439	1.0779	0.76199
3.7632	0.83188	0.050205
1.6408	0.32299	0.0075223
4.993	1.8418	0.38445
3.2958	0.88327	0.0024047
3.4966	3.8619	4.6117
2.437	0.55752	0.17423
3.0919	0.94252	0.094157
3.0895	0.82733	0.63851
1.3275	1.348	1.9435
4.2283	0.99874	0.022008
2.4345	2.8589	4.2019
4.9313	1.0412	0.0033558
1.2811	1.648	2.2151
4.7533	0.87452	0.083636
2.4308	2.8728	4.1455
2.7739	0.93778	1.139
1.3725	1.9343	3.6776
3.3579	1.1661	0.20858
2.1366	0.42267	0.028652
2.628	1.3004	1.3878
3.818	1.0506	0.31994
1.2815	1.715	3.2544
2.2339	0.43661	0.0047164
1.5289	0.44087	0.23171
2.5143	1.7079	2.8888
2.4546	0.72979	0.63132
1.5995	0.37279	0.076724
3.449	0.73953	0.010825
3.0237	0.64626	0.23952
1.0953	2.0159	3.7047
0.89899	3.5208	0.0092467
4.4892	0.77421	0.31355
4.6137	0.83089	0.010863
3.3946	2.752	2.1198
2.0256	0.47256	0.039354
2.3264	1.0159	1.1174
4.5379	1.2039	0.060921
1.8318	0.95245	1.3365
3.309	1.9548	2.3617
4.13	3.482	3.9978
1.5571	0.41044	0.063461
4.2982	0.82253	0.0018362
4.3111	0.75478	0.0039764
1.7792	0.75593	0.8313
1.1573	1.536	2.8914
2.3301	0.9435	0.60253
2.8684	0.85519	0.69692
4.8597	1.1711	0.0039755
2.4199	0.61128	0.024738
1.4463	0.34478	0.080411
2.5073	1.0474	0.41522
2.0373	0.76192	0.33517
0.8903	4.9313	0.070797
1.3081	1.204	2.0867
1.5267	2.0349	3.3831
1.7874	0.3526	0.019341
2.5652	0.58895	0.0094121
3.5817	0.78939	0.0096552
3.236	0.62328	0.01551
3.8789	1.8732	1.9498
3.157	0.74175	0.026131
2.4851	2.0254	2.4297
3.4228	0.56863	0.0066214
1.7627	1.4766	3.0937
2.3167	0.53383	0.0067609
4.0843	0.7794	0.0012445
3.2337	1.8698	1.2551
2.3969	0.44802	0.020781
1.5901	0.30044	0.0011699
1.7854	1.5268	2.4922
3.719	4.3902	4.7587
2.8117	1.7069	1.1525
1.2402	0.23439	0.0042541
3.9815	1.1521	0.016516
3.7452	0.6601	0.02182
2.17	2.7298	4.6845
4.7212	0.75932	0.037709
2.3531	0.68801	0.52426
2.923	0.54303	0.076272
3.871	0.99417	0.0012793
3.3867	0.75089	0.0016508
3.7654	2.1173	2.4101
2.6934	0.75824	0.019376
2.5834	0.64557	0.074443
3.0924	0.96715	0.086194
1.4556	0.63525	0.68963
1.4035	0.3321	0.026981
0.9375	1.8561	3.7659
3.6318	0.97903	0.013806
3.2344	0.94722	0.042788
2.7903	0.74823	0.0028437
2.4748	1.1495	0.70783
3.2515	0.75252	0.0010113
1.2145	0.304	0.093048
3.7424	0.97319	0.0051205
3.8446	2.8769	2.0011
3.2213	0.79555	0.0010562
2.6517	0.67273	0.0051714
4.0309	0.70135	0.0010523
3.5659	2.7417	4.4859
4.2591	1.1606	0.011225
4.7338	1.2065	0.30579
1.7466	0.44411	0.0084271
3.5774	1.0578	0.29554
1.4792	0.71156	0.57542
2.1501	0.41759	0.016014
3.9105	1.086	0.069812
4.8198	1.4993	0.043671
3.2977	0.81172	0.013601
2.0988	1.201	1.5738
3.065	0.77601	0.0051627
4.1236	1.4329	1.3012
4.3083	2.5836	3.0095
1.3174	1.0619	1.5868
4.4944	1.9386	0.84503
3.3311	2.8768	3.7766
1.8476	3.1978	4.5976
2.7027	0.65715	0.45647
3.7468	1.0375	0.0063915
4.8455	0.76313	0.09451
3.0587	0.7113	0.0015109
4.0946	0.8751	0.0020825
1.6834	1.0274	1.2091
1.8029	0.71111	0.38238
2.8751	1.1001	0.5144
3.6417	0.71654	0.0048468
2.413	0.68945	0.052782
2.5177	0.93294	0.46206
4.1761	0.92352	0.058953
2.161	0.45896	0.0018743
4.427	1.2521	2.1565
4.9757	1.3947	1.3909
3.7969	1.7952	1.8673
4.2125	0.69681	0.010671
1.5378	0.83255	1.1477
2.8416	0.56419	0.01825
2.8958	0.84148	0.0090856
1.2357	1.5775	2.21
3.4563	1.6905	0.90541
1.9394	0.42078	0.006325
2.0978	3.4412	4.5799
1.4018	1.3463	1.7343
3.7691	2.434	2.0758
2.556	0.44672	0.00427
1.5813	2.3679	2.8804
2.8477	1.6195	1.7706
2.5803	0.47892	0.064614
3.0572	0.75473	0.0025243
1.3505	0.57045	0.41136
3.8833	1.728	3.3921
1.707	0.96287	1.6096
4.204	1.1989	0.65727
2.9559	0.68747	0.36203
3.348	0.92503	0.0020194
1.5601	0.33398	0.0020858
2.3288	0.51144	0.04107
0.95996	2.1739	3.9501
2.5689	0.75393	0.6358
3.4691	0.97218	0.52723
2.1068	0.467	0.046158
2.3046	0.51905	0.0018611
4.234	0.73851	0.0050335
3.4856	2.488	2.5367
4.2665	2.5401	2.6398
3.2969	0.81106	0.10996
3.7284	0.89442	0.033541
1.5509	0.31641	0.013015
4.1074	2.5796	1.7578
4.2595	0.95675	0.0047809
1.4536	2.3076	4.0502
3.8537	1.393	1.0392
3.4707	0.63712	0.059698
4.3407	1.8919	0.70264
2.6052	0.55656	0.010305
2.0646	0.41253	0.010309
4.0305	0.81818	0.25232
3.6206	0.90485	0.88152
2.7991	0.52194	0.026024
1.4091	0.30635	0.002067
2.912	0.5488	0.0035334
3.5813	1.4769	2.5144
3.4541	0.60243	0.023317
4.0679	0.8805	0.0012892
3.6436	0.78922	0.015396
2.3481	0.4667	0.11425
1.2182	1.1768	1.9987
4.7109	1.1711	0.84273
2.7738	1.642	1.5203
3.8948	1.385	0.59373
2.46	0.65686	0.0062576
3.7192	1.0392	0.014749
1.7298	0.42182	0.0063798
2.2428	0.4542	0.023696
3.0361	2.0027	1.3296
1.3996	1.6013	3.2339
1.6837	0.51545	0.15723
3.5359	0.56708	0.0014083
3.566	0.77087	0.0031955
4.8232	4.4445	3.9769
4.5063	0.95408	0.74354
4.6223	0.76276	0.0039737
2.7788	1.3967	1.6765
3.743	2.5252	4.3595
3.754	4.6905	4.5796
2.1731	1.4228	1.3653
1.8001	0.40917	0.0062278
1.0342	1.0515	1.5882
2.0017	0.43621	0.018789
1.8437	0.65711	0.23767
1.8741	0.93484	0.97061
4.817	1.4316	0.012527
2.23	0.45452	0.022141
2.8008	0.62391	0.002576
1.9062	2.1398	2.7948
2.0726	1.4174	1.0509
2.0442	1.4204	1.225
1.8338	0.53723	0.25188
2.7636	0.54533	0.0060281
2.2587	0.57812	0.0049696
4.7346	0.99051	0.010711
3.2845	1.7695	3.3714
3.44	1.0271	0.31048
1.7648	0.37237	0.066705
3.1153	0.55499	0.026316
2.2803	2.4234	4.8263
3.2489	2.1031	3.4465
3.6256	1.5122	0.5802
3.1822	1.888	2.0494
3.6953	1.4603	2.0908
4.5224	0.79023	0.014934
2.4254	0.45551	0.0025018
1.3884	0.58781	0.4048
1.1895	0.55161	0.57031
3.1563	1.7708	4.8256
4.7189	1.2039	0.0038771
1.5955	0.53941	0.37579
3.8747	1.6339	4.0333
4.7979	4.2686	4.1442
4.6327	1.3568	0.0036259
4.6405	1.3732	0.0085511
4.7251	1.0444	0.0045132
3.6979	0.93196	0.0023331
3.2126	0.75422	0.020973
3.3881	1.6741	1.5407
1.2266	0.24502	0.0034083
2.3968	4.1814	4.9741
2.8493	0.53993	0.036495
3.5784	0.96944	0.15546
3.6257	1.37	0.53523
4.165	0.96798	0.0082204
4.1184	1.3958	1.119
3.8613	1.1131	0.23447
1.7259	0.78353	0.99308
2.3222	0.75429	0.27604
1.843	0.39663	0.0055029
1.5943	0.34592	0.0017831
0.91145	2.2222	0.0010351
4.3938	1.1452	0.98333
1.3583	1.9187	3.8521
4.0885	1.4625	2.4729
3.1476	0.80197	0.0050902
2.8964	0.53259	0.015834
1.1389	1.4442	2.0468
4.0002	1.2283	0.34665
2.8088	1.179	1.9497
3.4876	2.8639	3.7113
1.9647	0.81927	0.58863
3.8673	0.82955	0.012916
2.4205	0.64256	0.0050184
3.4648	0.76565	0.17617
2.3267	0.43721	0.0011399
1.4855	0.3307	0.062526
1.9985	0.82007	0.95496
4.8634	1.3796	0.23423
4.4523	2.3477	1.7598
3.0413	1.3192	1.431
1.31	0.26843	0.016173
1.946	0.71183	0.2593
3.887	0.85413	0.10743
4.8548	1.105	0.010443
4.3773	1.0759	0.012133
0.89315	1.9368	0.8354
4.7919	1.0673	0.2392
1.9058	0.46898	0.011578
2.7059	0.74019	0.32726
1.912	0.38402	0.035345
2.6936	1.3841	1.8772
4.9143	2.0026	4.7594
4.9714	0.82357	0.19186
3.9995	1.5127	0.43694
3.222	0.85448	0.015555
2.4316	0.91367	0.97666
2.6723	0.51308	0.0015025
1.7692	1.4341	1.2761
3.6756	0.83643	0.0068599
1.1958	1.991	4.0499
4.8005	1.3332	2.3702
1.5122	1.2704	1.5362
2.1169	1.4542	1.9863
1.0805	1.496	1.9757
4.0299	0.9887	0.042521
1.2479	0.32979	0.11843
3.608	0.7641	0.0020798
3.7952	0.85072	0.0017475
1.5559	0.96803	1.1375
4.8861	0.96678	0.29982
4.8398	1.1132	0.044303
4.4073	1.0025	0.04101
1.5571	0.56295	0.29807
1.542	0.40418	0.17003
1.2613	2.0212	3.8422
1.9209	0.44093	0.0014217
3.5339	0.95116	0.59986
4.7743	1.0876	0.0010221
2.017	2.1848	4.2028
3.7358	0.61798	0.0015849
2.4365	0.77041	0.14119
3.3217	0.64556	0.079427
2.4609	0.5527	0.15087
2.9272	1.9329	3.8889
3.2244	0.70367	0.18628
1.8848	0.50582	0.06709
1.4151	0.66495	0.44666
1.9797	0.42821	0.10198
3.8806	0.82092	0.14265
2.7654	2.0305	1.9733
1.5406	0.35131	0.0024947
2.8652	2.0553	3.3335
4.9079	1.698	0.92404
2.7512	0.71851	0.0028038
2.2429	0.51599	0.16266
3.4162	1.4929	0.87062
1.2452	0.74435	0.72689
4.6923	1.2537	0.059612
1.059	0.62051	0.7141
0.90345	3.4237	0.0011084
1.9265	0.44298	0.015139
3.0384	1.3242	1.0788
4.6953	1.153	0.0041582
4.38	2.3097	1.165
3.7403	0.8838	0.011948
4.0029	2.2814	3.9674
3.5391	0.62322	0.021359
3.0936	0.7743	0.02867
2.1158	0.45197	0.020846
4.9429	1.4134	0.060521
2.5516	2.0457	1.8767
4.1704	1.357	0.15765
4.0622	0.72228	0.034913
2.0253	0.39394	0.0041089
2.2272	0.81501	0.41998
4.0512	0.9472	0.0054541
3.4907	1.1632	0.40311
3.9871	0.96067	0.0019143
1.5726	1.5165	1.5008
2.7285	0.89671	0.1991
2.6112	0.53732	0.0044137
3.5298	1.0696	1.364
3.7292	1.0189	0.02046
1.7477	0.33411	0.0010753
1.8401	0.36023	0.0020701
4.3528	1.4186	1.9422
3.665	0.75702	0.12733
1.5297	0.31697	0.022624
3.333	1.6625	0.89926
2.1665	0.40272	0.0044758
2.8611	0.69985	0.018015
3.3004	0.85219	0.30239
4.878	1.308	0.0047022
3.3603	0.98841	0.0024396
3.381	0.83053	0.012543
4.7799	1.3782	0.0018159
1.1636	3.6052	4.5873
1.5999	0.30314	0.0015255
2.93	1.4261	1.3658
4.1043	1.0552	0.026966
3.3724	1.8537	1.4428
1.6238	1.6902	3.0335
2.1505	0.44478	0.011619
2.6624	0.54224	0.009541
2.0481	1.1314	1.5077
2.1934	2.2707	2.3749
4.2909	0.71539	0.0010089
1.8627	0.50356	0.037536
2.3758	0.574	0.18433
3.9544	1.0109	0.98864
4.7248	3.2417	4.4717
2.1611	1.2155	1.298
3.4381	1.5974	0.89385
3.1936	0.93119	0.014345
4.6808	1.893	3.1657
4.1919	0.96609	0.0093167
1.3618	0.30541	0.01607
2.733	0.8736	0.37178
3.9315	0.91375	0.0018617
3.5295	1.9978	2.7765
4.1403	0.74349	0.0044433
4.9142	1.8973	1.9801
4.1585	0.88632	0.2426
4.2351	1.0668	0.20174
1.3264	0.2897	0.036315
1.4795	0.90158	1.219
2.6205	0.51793	0.010513
3.8714	4.0841	3.7143
1.5868	0.36074	0.058123
2.3154	1.2641	2.2219
2.6357	0.71594	0.029852
3.427	0.69263	0.16211
4.346	2.7085	3.999
3.125	0.79919	0.0067112
2.8497	0.78595	0.020786
2.2444	0.61817	0.14518
3.6157	0.76585	0.011201
2.6143	0.46164	0.001272
3.317	0.61232	0.1914
4.7238	0.79281	0.11997
4.2088	1.2854	2.1028
3.1869	0.57592	0.086877
2.3567	0.60884	0.16998
2.4512	0.49746	0.0032515
1.1204	1.0576	1.1501
4.5222	0.92526	0.0029549
4.8934	1.6965	1.0127
1.1639	0.90658	0.99708
4.4291	2.7384	3.8428
1.2129	1.2684	1.8788
3.0277	2.0716	2.1683
4.6702	1.485	0.28019
1.6039	0.69174	0.55857
3.3193	0.57935	0.0038965
3.7091	1.8012	1.4033
3.8889	0.89652	0.0062675
2.77	2.8821	2.5316
4.8221	0.99123	0.0035048
4.4714	0.91684	0.73371
3.484	0.83404	0.0019444
3.7721	0.67169	0.0093572
2.8493	1.5724	2.768
4.939	0.8741	0.057896
3.7021	1.1608	0.57853
4.5042	1.3472	0.48137
3.7961	2.6413	4.8058
2.828	0.7013	0.026474
2.8052	0.75036	0.0030496
1.9116	3.1175	4.2199
2.8925	0.68659	0.0056125
1.3386	0.51048	0.34253
3.6372	0.79326	0.10604
1.1891	0.70132	0.77025
1.633	0.32334	0.0013558
1.9392	1.5602	3.5185
2.6065	0.65849	0.051705
3.9387	0.89165	0.08462
4.2866	0.69484	0.069475
2.3098	0.88895	0.62594
1.3954	0.49053	0.37704
4.4893	1.3089	0.0074874
1.9823	2.0539	3.1475
4.3393	1.0687	0.0021039
1.4213	1.8335	4.3071
0.95628	2.5136	3.4411
2.6425	0.56475	0.033434
2.7889	1.1953	0.76989
1.2463	0.31083	0.10294
3.5875	0.77094	0.22553
3.6573	0.88313	0.12033
3.4367	1.677	3.181
4.7062	1.0297	0.13081
4.1997	1.1894	0.017472
3.5416	1.6621	1.9885
4.5889	0.76099	0.015304
4.1258	0.74942	0.001396
4.2983	0.83098	0.029445
1.3996	1.9239	3.6884
3.1145	0.73329	0.0059792
3.9643	0.7243	0.0032675
2.7485	2.0078	3.8052
3.3823	0.78363	0.079862
2.8613	0.70932	0.0013316
4.0626	0.98702	0.0044553
1.3393	0.34456	0.077951
3.7627	2.8172	3.0965
2.7482	0.71717	0.0033156
2.2304	0.5393	0.020583
3.9169	0.66491	0.0043171
4.5091	1.2767	0.71465
3.6389	0.84185	0.015599
2.3298	0.59067	0.1143
4.8429	0.90045	0.18611
2.7572	2.5671	3.5498
3.9481	0.8234	0.0015956
2.4929	0.68452	0.0022488
0.89796	3.3949	0.32958
2.9598	1.2151	1.8129
3.8075	0.94415	0.012168
4.4006	1.4263	0.14207
3.7319	0.85943	0.0061549
3.8854	1.1975	0.23075
3.7558	0.65725	0.012771
3.8631	1.1238	0.76279
2.653	0.95609	1.4688
1.7383	1.6728	2.4274
2.7116	1.1297	0.43725
1.1075	0.60292	0.56109
2.963	3.5857	4.0857
1.6809	0.33328	0.0016365
4.3835	1.3854	0.14208
2.8621	0.73588	0.0026928
4.1011	1.0357	0.016402
3.1579	1.1019	0.80509
3.6311	0.79468	0.49638
1.1126	2.5895	3.4119
1.798	0.35135	0.0042465
1.7272	0.38284	0.0073964
2.2118	0.60699	0.026518
4.0996	0.83121	0.33852
2.0885	1.2715	2.7418
3.1666	2.4978	3.274
3.462	0.99492	0.0013926
2.0505	0.50264	0.0062516
4.304	1.023	0.2715
2.1124	0.43342	0.071076
3.3459	0.69417	0.24299
4.986	0.93015	0.0038163
2.0671	0.45711	0.0067154
1.1565	0.22289	0.0019903
1.8307	0.34684	0.01304
1.789	0.39372	0.11755
1.957	0.55643	0.29469
4.1195	2.3364	3.3133
4.2897	1.2257	0.010886
2.0429	1.1492	1.6171
3.6161	3.5023	3.2666
3.984	0.92041	0.051735
3.0387	0.6292	0.00213
1.7623	2.9807	4.8191
3.1169	1.7499	2.5501
4.4474	1.5107	2.2294
1.9949	1.8087	1.9216
2.1085	0.66388	0.19101
1.7391	1.418	1.7072
3.0973	1.5906	0.83787
4.4237	3.8381	3.2188
2.6286	0.82048	0.095067
2.7467	0.57386	0.25471
2.5133	1.6389	2.7443
3.2429	0.93417	0.061259
3.6929	1.0839	0.0015445
2.9135	0.68423	0.50166
4.1149	3.0059	4.8754
1.2249	0.24261	0.0028308
4.7086	1.2344	0.038514
2.6941	1.1215	0.6865
3.0395	1.0001	0.18937
2.8288	0.5464	0.0036296
2.2688	0.68298	0.15753
2.727	0.74994	0.25982
4.2633	1.5879	1.5331
4.1536	1.0642	0.93615
3.5674	1.057	0.065527
3.4583	1.7656	1.3835
2.6535	0.63351	0.0014073
3.4945	2.8566	2.8257
2.5605	0.70743	0.0011577
2.0108	0.7109	0.35388
3.5803	1.0766	0.084642
1.4174	0.84857	0.88425
4.0372	0.88419	0.002966
1.8328	0.35334	0.0021549
2.0361	0.51034	0.1092
2.0209	1.5634	1.667
3.068	0.64419	0.10752
2.5919	0.63413	0.023895
2.1215	0.53549	0.19055
1.7703	0.34259	0.0091162
1.5115	0.75071	0.55131
3.323	1.8438	1.5932
2.2713	0.99702	0.99414
1.5646	0.53297	0.4005
2.5889	2.3765	2.55
4.9009	2.6353	4.5663
3.6325	0.74593	0.14794
4.1018	1.1777	0.012747
4.8162	0.75014	0.012367
2.2675	0.8777	0.66266
2.2826	1.2476	0.73957
4.3889	1.7411	1.134
2.3803	0.7909	0.95186
4.041	0.71409	0.019782
1.09	1.3078	1.8247
1.6301	0.39317	0.055154
2.8487	0.99861	0.24918
3.687	3.2146	3.2949
0.91526	0.86966	1.1554
1.5938	0.37866	0.13772
3.0727	0.8507	0.083755
0.89391	1.6746	3.0669
4.3318	1.173	0.11988
3.2991	0.90152	0.0038052
4.5199	1.2528	0.0036047
3.88	0.95295	0.085834
4.1778	0.77376	0.023576
4.8157	1.1625	0.017665
2.4714	1.5433	1.8028
1.9873	0.94214	1.5051
1.4799	0.54405	0.50011
4.8466	1.6877	3.7774
3.8497	1.4036	1.1794
1.2219	1.9322	4.6337
3.6713	0.75148	0.20288
1.9477	0.46857	0.0066035
3.0884	1.2629	1.0126
1.4278	0.49505	0.36698
3.2824	1.4005	2.0226
2.8358	0.54234	0.064981
3.7082	1.7327	1.5812
1.6794	0.45351	0.13405
3.9283	1.4598	2.7014
3.5358	1.7997	4.1118
3.356	1.1235	0.23508
2.5948	0.87626	0.44374
2.0624	0.62617	0.544
4.4026	0.72147	0.015034
1.2392	0.25728	0.0099575
3.0105	0.87275	0.0034377
3.0572	2.1793	2.0132
2.5148	2.3506	3.9275
3.614	2.0806	4.4078
2.974	0.5607	0.1094
2.9593	0.93921	0.13126
2.4378	0.53721	0.2334
4.7419	0.75692	0.019719
3.9654	1.1574	0.15841
0.90863	2.6428	0.016014
1.4856	2.1603	3.2077
3.8098	1.1288	1.5297
2.3103	1.4028	1.3813
1.4353	0.3175	0.0036425
1.6315	0.37629	0.0035772
4.4841	0.75439	0.001558
3.4569	0.69892	0.0024679
4.93	1.1686	0.0011886
3.2168	0.77123	0.0014727
0.8955	4.3053	0.095108
1.748	0.40921	0.1215
3.3556	0.74658	0.0024191
1.6034	3.0485	3.4431
2.022	0.51943	0.021477
1.4726	1.7471	1.8863
4.431	0.77341	0.13402
3.098	1.0304	0.63945
2.5016	0.56459	0.0076428
1.4959	1.9891	3.8287
3.4812	1.1022	1.239
3.7572	1.1292	0.045379
2.9866	0.61592	0.0085506
2.795	0.58135	0.047056
4.1502	1.3468	0.72286
1.4832	1.4014	1.9842
3.241	1.1056	0.51293
3.4154	0.68707	0.0056768
2.9093	2.2305	1.7793
3.4337	0.73393	0.0018752
3.0219	3.7271	4.3525
3.1654	1.4131	1.4354
3.1953	0.75929	0.047439
2.038	1.7087	2.0769
4.4484	0.73293	0.039674
4.0407	1.1824	0.017149
3.8618	1.372	2.5594
4.4969	3.171	3.8446
1.6065	0.37711	0.0041712
1.7192	0.34748	0.035127
1.416	1.9394	4.6539
2.0998	2.5027	4.7798
1.5667	0.43973	0.17838
2.3397	1.1133	1.8756
2.327	0.55624	0.026025
3.1829	0.79289	0.0010963
4.7874	1.6737	1.6509
1.6111	0.32727	0.0087233
3.0736	0.89517	0.44871
3.7016	3.226	4.0021
0.91998	2.0028	0.0017265
4.3088	1.5623	1.8676
2.0812	2.0619	4.8777
2.0314	0.41329	0.016084
2.3139	0.92841	1.2183
2.4469	1.2014	0.80996
2.3228	0.57102	0.030349
4.9817	1.0599	0.88303
1.1035	3.6769	4.7713
1.7423	0.83082	0.63604
1.4696	0.30276	0.011136
0.91207	1.8404	0.015488
1.7913	0.45444	0.0065614
1.6141	0.38288	0.14582
2.253	0.61742	0.029279
3.2921	0.6808	0.060688
2.8855	2.3419	2.8644
3.4987	0.98579	0.0014845
4.8877	0.94322	0.0037446
3.808	1.2385	0.29221
3.5232	0.57982	0.0014201
1.6187	0.34001	0.0044984
2.7342	1.4733	1.0659
2.8551	0.75038	0.039631
2.8276	0.66349	0.11846
2.3251	1.0257	0.55085
2.0608	0.90157	0.43508
2.611	1.1499	1.2608
2.8068	0.79846	0.24583
2.8296	0.94681	0.18512
3.0715	1.4584	2.1861
3.2274	0.81052	0.077209
4.332	2.422	3.0722
2.5586	0.51783	0.0033089
3.1631	2.8194	2.6527
2.6531	0.47955	0.0063205
2.3561	1.5624	3.4729
1.7313	3.603	4.1457
3.2457	1.5126	2.5228
3.3543	0.56649	0.044013
0.78712	1.6895	2.6356
3.9684	2.1038	1.0826
4.4443	0.80835	0.010215
4.5342	2.4228	3.1273
4.737	0.826	0.0033603
3.0267	1.4228	0.71372
2.5542	0.56876	0.0023609
1.4061	0.39921	0.20745
3.5375	0.85034	0.72106
1.2209	0.35382	0.18695
4.1607	0.91374	0.66172
1.7032	0.49752	0.099127
4.7696	1.0168	0.57836
2.5671	1.8093	2.0399
2.9562	0.83887	0.0053482
4.5335	1.6221	0.7115
3.0702	1.4011	0.82455
2.5105	0.96046	0.33084
3.6089	0.91499	0.71287
3.0603	0.77722	0.31299
2.325	0.43276	0.0013766
4.5012	4.2113	3.3404
1.4518	3.5031	4.2066
1.5727	2.7062	3.1983
1.2431	1.3315	1.6307
3.2597	1.101	0.18811
4.8924	1.5172	0.21673
2.2328	1.2661	1.3931
1.4746	1.8662	3.8329
3.7769	1.2274	0.63687
1.9809	1.63	1.9763
1.7981	0.48503	0.19566
3.9918	0.82475	0.38416
2.7578	1.1439	0.46421
4.8527	1.0117	0.30607
2.2107	0.45553	0.13041
4.2496	2.9775	2.0336
1.3976	0.82127	0.96821
1.7815	0.56947	0.14542
4.5294	1.2124	0.10818
4.7313	2.3116	1.2091
1.9369	0.44777	0.015971
3.4797	0.89171	0.0065485
2.9778	0.64485	0.0089635
2.58	0.85757	0.19899
2.4174	0.45444	0.0021837
4.5955	1.2377	0.0010644
3.2291	1.259	1.8194
4.1421	0.67861	0.018106
2.7874	0.5853	0.0060966
4.4634	0.8468	0.057613
2.9473	1.1424	0.64901
4.8902	0.96769	0.002189
3.9888	1.8491	3.7212
2.1748	0.58019	0.0059756
4.2724	3.4794	2.7058
3.8972	0.70617	0.0070542
0.89991	4.2307	0.0030933
1.2767	0.24129	0.0042843
1.8636	0.44782	0.013461
2.092	0.47417	0.0027474
2.7272	1.1809	2.0069
1.5524	0.36238	0.014722
4.0017	0.66887	0.0020253
1.7665	0.56733	0.18712
3.6929	0.98362	0.35114
1.7917	3.6289	4.3769
2.6603	2.1662	3.2561
3.1489	0.6319	0.056782
4.9858	1.4426	0.0014967
1.9261	0.99457	1.5694
0.91559	2.6229	4.1446
1.2136	1.657	2.7622
1.0493	1.3688	1.9895
3.9103	1.0238	0.1365
4.3801	0.98512	0.14582
2.3941	1.0908	0.89307
3.3451	1.1994	0.34792
2.4963	0.51139	0.0013123
3.8267	1.2704	0.3055
3.453	0.99418	0.88073
1.0043	1.2245	1.7011
1.4834	0.5347	0.37498
3.1887	0.60918	0.0010185
4.6469	1.1023	0.0028096
4.2079	0.68321	0.021231
3.1341	0.77876	0.17373
1.5179	0.33621	0.0077474
1.1149	0.52789	0.50537
2.4406	0.86151	0.2445
2.1703	0.99343	0.65845
2.2489	1.2495	1.3132
2.3893	1.594	1.6017
2.3614	0.60786	0.11725
3.2643	1.7676	3.1984
3.4798	1.8322	2.4217
4.7635	1.5872	1.8612
1.7843	1.1164	0.924
2.0648	1.3104	1.0754
1.3015	0.76773	0.79795
2.3524	2.3793	2.2709
2.5993	0.61332	0.0049108
4.0146	1.1949	1.1994
4.4371	1.1401	1.3479
3.0541	0.63021	0.0023052
4.0394	0.9787	0.0010512
2.0499	0.64988	0.2027
3.0899	0.87351	0.0073272
1.6836	1.4531	2.2928
2.1265	0.51572	0.0345
2.5063	0.66805	0.11819
1.3705	0.26627	0.0027541
3.1976	0.81152	0.0023028
3.1601	0.59394	0.0040001
1.0407	0.9342	1.3022
1.5356	0.38328	0.041553
3.5804	0.64486	0.10747
0.89638	3.8543	0.04142
4.9088	1.3451	0.37145
2.5494	2.1887	2.8307
3.29	0.58794	0.0070128
1.5217	1.7943	2.8036
2.2491	0.43622	0.0012761
3.4066	0.89835	0.0051512
2.2548	0.45415	0.0022676
1.6444	0.33444	0.0015328
4.7965	1.1009	0.010294
2.1831	0.56741	0.010888
1.8034	1.4566	1.3471
1.3391	0.90646	1.3077
2.7298	0.74188	0.38771
1.4867	1.7112	4.0105
2.1382	0.75022	0.77492
[truncated: 4,683 more rows]

## Sheet: MAP
Fig4.D					Fig5.E					Fig7.D
	LX	S	LY			LX	S	LY			LX	S	LY
u = 0	10.7007	0	10.7007		u = 0	10.7007	0	10.7007		uy = 0	-4.768	0	-4.768
u = 0.0565	-50.5914	0	-50.5914		ux = 0.06	0		-77.6248		uy = 0.05		0	-14.2249
Fig4.G					Fig5.G
	LX	S	LY			LX	S	LY
u = 0	-4.768	0	-4.768		u = 0	-4.768	0	-4.768
u = 0.03	21.1346	0	21.1346		ux = 0.06	-15.5954	0
